# Supplementary material for: What Does “ITS” Say about Hybridization in Lineages of Sarsia (Corynidae, Hydrozoa) from the White Sea?
Source: MDPI journal article supplement (doi:10.3390/d15050675), 2023-05-17
Supplement: s1 [file s1]

**Table S4.** Specimens and ITS haplotypes of *Sarsia lovenii* (SI-1 – SI-14), *Sarsia tubulosa* (St-1, St-2) and *Sarsia princeps* visualized at haplotype network (Figure 4). Abbreviations: allele\_1 and allele\_2 – haplotypes separated manually from sequences with one heterozygote. Phase1 and phase2 - haplotypes separated from sequences by means of Champuru v. 1.1 (Flot, 2007). St-1-add – specimens *S. tubulosa* of haplotype 1 with additive heterozygotes in some loci. St-1/2 – specimens with many single heterozygotes. Specimens of *S. tubulosa* with heterozygotes (St-1-add and St-1/2) were not included in haplotype analyses.

| Haplotype | Specimens                                                                                                                                                                                                                                                                                                                                                                                                                                                                                                                                                                                                                                                                                                                                                                                           |
|-----------|-----------------------------------------------------------------------------------------------------------------------------------------------------------------------------------------------------------------------------------------------------------------------------------------------------------------------------------------------------------------------------------------------------------------------------------------------------------------------------------------------------------------------------------------------------------------------------------------------------------------------------------------------------------------------------------------------------------------------------------------------------------------------------------------------------|
| SI-1      | MSU1_allele_2, MSU5, MSU6, S7_allele_1, S8, S9_allele_1, S10, S29, S34, S35, S38, H90, H93, H103_phase1, H104, H106, H107, H108_allele_2, H109_phase1, H112_allele_1, H116, H119, H120, H130, H135, H136_allele_1, H137, H138_allele_1, H139, H140_phase2, H141_phase1, H142, H143_allele_2, H144_phase1, H144_clon-3, H145_allele_2, H148_allele_2, H149_phase1, H151_phase2, H152, H154, H155_phase1, H158_phase1, H159_phase2, H160, H162, H164_allele_1, H166_allele_1, H169, H171, H172, H173, H174, H175, H177, H178, H179_phase1, H182_allele_1, H235, H237, H247_phase2, H250, H252, H256, H257_allele_2, H258, H261, H262, H263, H264, H266, H267_allele_2, H268, H269, H270, H271_phase1, H289, H290_phase2, H291_phase2, H333_allele_2, H337_phase1, H340_phase1, H346, H347, H348, H349 |
| SI-2      | EV8, EV13, EV14, EV15, S2, S17, S18, S20_phase1, S25_phase1, S36, H94, H95, H105_allele_2, H113, H115, H122_clon-1, H122_clon-3, H140_phase1, H144_phase2, 144_clon-7, 144_clon-8, H149_phase2, H151_phase1, H156, H158_phase2, H159_phase1, H167, H168_phase2, H176_allele_2, H180, H232_phase1, H233, H236_allele_2, H247_phase1, H248_phase1, H251, H253, H260_phase1, H277_phase1, H287_allele_1, H290_phase1, H291_phase1, H335_phase2, H338_phase2, H355_phase1, H356_allele_1, H357, H358_allele_2, H359, H360_allele_1                                                                                                                                                                                                                                                                      |
| SI-3      | MSU1_allele_1, S7_allele_2, S9_allele_2, H108_allele_1, H112_allele_2, H136_allele_2, H138_allele_2, H143_allele_1, H145_allele_1, H148_allele_1, H164_allele_2, H166_allele_2, H182_allele_2, H254_phase1, H259_phase1, H265_phase1, H267_allele_1, H333_allele_1, H335_phase1, H338_phase1, H339_phase1                                                                                                                                                                                                                                                                                                                                                                                                                                                                                           |
| SI-4      | H109_phase2, H179_phase2, H259_phase2, H265_phase2, H271_phase2, H332, H334, H336, H339_phase2, H340_phase2, H341_phase2                                                                                                                                                                                                                                                                                                                                                                                                                                                                                                                                                                                                                                                                            |
| SI-5      | S20_phase2, H232_phase2, H238_phase2, H248_phase2, H260_phase2, H277_phase2                                                                                                                                                                                                                                                                                                                                                                                                                                                                                                                                                                                                                                                                                                                         |
| SI-6      | H105_allele_1, H176_allele_1, H236_allele_1, H238_phase1, H287_allele_2, H356_allele_2, H360_allele_2                                                                                                                                                                                                                                                                                                                                                                                                                                                                                                                                                                                                                                                                                               |
| SI-7      | H141_phase2, H155_phase2, H337_phase2                                                                                                                                                                                                                                                                                                                                                                                                                                                                                                                                                                                                                                                                                                                                                               |
| SI-8      | H103_phase2, H257_allele_1                                                                                                                                                                                                                                                                                                                                                                                                                                                                                                                                                                                                                                                                                                                                                                          |
| SI-9      | S25_phase2, H355_phase2                                                                                                                                                                                                                                                                                                                                                                                                                                                                                                                                                                                                                                                                                                                                                                             |
| SI-10     | H168_phase1                                                                                                                                                                                                                                                                                                                                                                                                                                                                                                                                                                                                                                                                                                                                                                                         |
| SI-11     | H358_allele_1                                                                                                                                                                                                                                                                                                                                                                                                                                                                                                                                                                                                                                                                                                                                                                                       |
| SI-12     | H254_phase2                                                                                                                                                                                                                                                                                                                                                                                                                                                                                                                                                                                                                                                                                                                                                                                         |
| SI-13     | H341_phase1                                                                                                                                                                                                                                                                                                                                                                                                                                                                                                                                                                                                                                                                                                                                                                                         |
| SI-14     | clon122-8                                                                                                                                                                                                                                                                                                                                                                                                                                                                                                                                                                                                                                                                                                                                                                                           |
| St-1      | EV7, EV9, EV10, EV11, S4, S31, S33, S39, H102, H231, H249, H272, H278,                                                                                                                                                                                                                                                                                                                                                                                                                                                                                                                                                                                                                                                                                                                              |

|                            |                                                        |
|----------------------------|--------------------------------------------------------|
|                            | H280, H282, H286                                       |
| St-1-add                   | S1, S4, S31, H231, H272                                |
| St-2                       | H273 H276                                              |
| St-1/2                     | S5, S28, S32, EV12, H279, H281, H283, H284, H285, H288 |
| <i>Sarsia<br/>princeps</i> | S30                                                    |
