# Supplementary material for: What Does “ITS” Say about Hybridization in Lineages of Sarsia (Corynidae, Hydrozoa) from the White Sea?
Source: MDPI journal article supplement (doi:10.3390/d15050675), 2023-05-17
Supplement: s1 [file s1]

**Table S2.** Specimens, haplotypes and haplogroups COI of *S. lovenii*, *S. tubulosa* and *S. princeps* visualized at haplotypes net (Figure 3B). Sequences excluded from analysis of COI-haplotypes denoted in table as “exc”. Morphotypes for *S. lovenii*: medusoid, medusa, attached medusa, abnormal medusoid, unknown morphotype.

| Species and haplotype                     | Specimens                                                                                                                                                                                                                                                                                                                                                                                                                                                                                                                                                                                                                                                               |
|-------------------------------------------|-------------------------------------------------------------------------------------------------------------------------------------------------------------------------------------------------------------------------------------------------------------------------------------------------------------------------------------------------------------------------------------------------------------------------------------------------------------------------------------------------------------------------------------------------------------------------------------------------------------------------------------------------------------------------|
| <i>S. lovenii</i> haplogroup 1            | <b>medusoid:</b> S34, H117, H119, H130, H139, H152, H332, H346, H347, H349<br><b>attached medusa:</b> H149, H150, H159, H163, H337<br><b>abnormal medusoid:</b> H148, H182, H336, H339, H341<br><b>unknown:</b> MSU1, MSU2, MSU3, MSU4, MSU6, S8, S9, S10, H93, H103, H104, H107, H108, H109, H111, H112, H114, H116, H118, H120, H135, H136, H138, H142, H143, H145, H160, H162, H164, H166, H169, H172, H174, H175, H177, H178, H179, H184, H237, H250, H252, H256, H257, H258, H261, H262, H263, H264, H266, H267, H268, H269, H270, H271, H333,<br><b>exc:</b> S6, S7, S29, S38, H106, H137, H154, H158, H170, H171, H173, H235, H289, H334, H335, H338, H340, H348 |
|                                           | <b>medusoid:</b> H90                                                                                                                                                                                                                                                                                                                                                                                                                                                                                                                                                                                                                                                    |
|                                           | <b>abnormal medusoid:</b> H254, H259, H265                                                                                                                                                                                                                                                                                                                                                                                                                                                                                                                                                                                                                              |
|                                           | KT981910                                                                                                                                                                                                                                                                                                                                                                                                                                                                                                                                                                                                                                                                |
| <i>S. lovenii</i> haplogroup 2            | <b>medusa:</b> MSU9, S2, S17, S18, S19, S21, S22, S24, S25, S27, H155, H253, H277, H355, H356, H357, H358, H360<br><b>attached medusa:</b> H140, H141, H157, H168, H290, H291<br><b>unknown:</b> H94, H105, H110, H113, H115, H122, H144, H151, H156, H167, H176, H180, H232, H233, H236, H238, H247, H251, H260,<br><b>exc:</b> S36, 95, H153, H287, H359                                                                                                                                                                                                                                                                                                              |
|                                           | <b>medusa:</b> S20                                                                                                                                                                                                                                                                                                                                                                                                                                                                                                                                                                                                                                                      |
|                                           | MG422634                                                                                                                                                                                                                                                                                                                                                                                                                                                                                                                                                                                                                                                                |
|                                           | <b>unknown:</b> H248                                                                                                                                                                                                                                                                                                                                                                                                                                                                                                                                                                                                                                                    |
| <i>S. lovenii</i> unidentified haplogroup | <b>unknown:</b> H97                                                                                                                                                                                                                                                                                                                                                                                                                                                                                                                                                                                                                                                     |
| <i>S. tubulosa</i>                        | S1, S4, S5, S28, S31, S33, H231, H249, H272, H273, H278, H281, H283, H284, H285, H286<br><b>exc:</b> S32, H102, H280, H282, H288?                                                                                                                                                                                                                                                                                                                                                                                                                                                                                                                                       |
|                                           | JQ353758                                                                                                                                                                                                                                                                                                                                                                                                                                                                                                                                                                                                                                                                |
|                                           | KY767915                                                                                                                                                                                                                                                                                                                                                                                                                                                                                                                                                                                                                                                                |
|                                           | KY767916                                                                                                                                                                                                                                                                                                                                                                                                                                                                                                                                                                                                                                                                |
|                                           | KY767917                                                                                                                                                                                                                                                                                                                                                                                                                                                                                                                                                                                                                                                                |
|                                           | KC440085                                                                                                                                                                                                                                                                                                                                                                                                                                                                                                                                                                                                                                                                |
|                                           | GQ120063                                                                                                                                                                                                                                                                                                                                                                                                                                                                                                                                                                                                                                                                |
|                                           | HQ970894, HQ970898, HQ970899                                                                                                                                                                                                                                                                                                                                                                                                                                                                                                                                                                                                                                            |
|                                           | KC440086, GQ120062, S39                                                                                                                                                                                                                                                                                                                                                                                                                                                                                                                                                                                                                                                 |
|                                           | H279                                                                                                                                                                                                                                                                                                                                                                                                                                                                                                                                                                                                                                                                    |
|                                           | KC440087                                                                                                                                                                                                                                                                                                                                                                                                                                                                                                                                                                                                                                                                |
|                                           | H276                                                                                                                                                                                                                                                                                                                                                                                                                                                                                                                                                                                                                                                                    |
| <i>S. princeps</i>                        | MG423490, JF884214                                                                                                                                                                                                                                                                                                                                                                                                                                                                                                                                                                                                                                                      |
|                                           | GQ120061                                                                                                                                                                                                                                                                                                                                                                                                                                                                                                                                                                                                                                                                |
|                                           | S30, JF884210                                                                                                                                                                                                                                                                                                                                                                                                                                                                                                                                                                                                                                                           |
