# Supplementary material for: What Does “ITS” Say about Hybridization in Lineages of Sarsia (Corynidae, Hydrozoa) from the White Sea?
Source: MDPI journal article supplement (doi:10.3390/d15050675), 2023-05-17
Supplement: s1 [file s1]

**Table S3.** Alleles of significant loci of ITS dataset associated with interspecies and haplotypes differences (see Figure 4).

| Number of locus<br>in dataset | alleles                             | Number of locus<br>in dataset | alleles | Number of locus<br>in dataset | alleles            |
|-------------------------------|-------------------------------------|-------------------------------|---------|-------------------------------|--------------------|
| 9                             | A, T                                | 106                           | T, -    | 440                           | C, T               |
| 28-29                         | TT, CT,<br>CG, CK,<br>TY, YT,<br>TC | 347                           | G, A    | 452                           | A, G               |
| 37-38                         | CG, --                              | 368                           | C, T    | 489-490                       | TC, CA             |
| 45                            | A, C                                | 386                           | C, T    | 493-499                       | GGTTC-G<br>TTCCTAA |
| 59-60                         | CT, TC, TT                          | 393                           | C, T    | 502-504                       | GAA, ---           |
| 62                            | C, -                                | 409                           | C, T    |                               |                    |
| 92                            | T, A                                | 429                           | A, G    |                               |                    |
