# Supplementary material for: What Does “ITS” Say about Hybridization in Lineages of Sarsia (Corynidae, Hydrozoa) from the White Sea?
Source: MDPI journal article supplement (doi:10.3390/d15050675), 2023-05-17
Supplement: s1 [file s1]

**Table S1.** List of *Sarsia* specimens from the White Sea used for phylogenetic analyses: collection data and GenBank accession numbers. Abbreviations: Exp – Experiment. Species: Sl – *Sarsia lovenii*, St – *Sarsia tubulosa*. Sex: Fem – female, male. Gonophore type: 1 – medusoid, 2 – medusa, 3 – attached medusa, 4 – “abnormal medusoid”. Stage: p – polyp, m – medusa, pm – medusoid. Locality (see Fig. 1): W1 – Aquarium at WSBS; W2 – Pier of WSBS; W3 – Ereemeevskie rapids; W4 – saline lake at the Green Cape; W5 – location “Luda”; W6 – location “Krest”; W7 – Rugozerskaya inlet, depth 5-15 m; W8 – Polovye islands; W9 – Velikaya Salma Strait, depth 40-60 m.

| DNA Isolate | Gonophore type when known | Specimen location/ substratum/ crossing scheme/ Stage | Data collection or start and end of experiment | Photo | GenBank accession number |                                                   |
|-------------|---------------------------|-------------------------------------------------------|------------------------------------------------|-------|--------------------------|---------------------------------------------------|
|             |                           |                                                       |                                                |       | COI                      | ITS                                               |
| H90         | 1                         | Barents Sea, Dalnezelenetskaya inlet/p                | 7.07.2019                                      | +     | OQ859859                 | OQ863006                                          |
| H93         | -                         | W4/ <i>Fucus</i> sp./p                                | 21.08.2019                                     | +     | OQ859860                 | OQ863007                                          |
| H94         | -                         | W7/ <i>Modiolus modiolus</i> shell/p                  | 21.08.2019                                     | +     | OQ859861                 | OQ863008                                          |
| H95         | -                         | W5/ Porifera, stone/p                                 | 16.08.2019                                     | +     | OQ859862                 | OQ863009                                          |
| H97         | 2                         | Bering Sea, Senyavin Strait/m                         | 18.08.2019                                     | +     | OQ859863                 | OQ863010                                          |
| H102        | -                         | W5/stone/p                                            | 4.08.2019                                      | +     | OQ859724                 | OQ862838                                          |
| H103        | -                         | W4/stone/p                                            | 21.08.2019                                     | +     | OQ859725                 | H103_phase1 – OQ862839;<br>H103_phase2 – OQ862840 |
| H104        | -                         | W4/stone/p                                            | 22.08.2019                                     | +     | OQ859726                 | OQ862841                                          |
| H105        | -                         | W5/stone/p                                            | 14.08.2019                                     | +     | OQ859727                 | OQ862842                                          |
| H106        | 1                         | W3/stone/p                                            | 29.06.2019                                     | +     | OQ859728                 | OQ862843                                          |
| H107        | -                         | W3/stone/p                                            | 28.09.2019                                     | +     | OQ859729                 | OQ862844                                          |
| H108        | -                         | W3/stone/p                                            | 7.07.2019                                      | +     | OQ859730                 | OQ862845                                          |
| H109        | -                         | W4/stone/p                                            | 8.06.2019                                      | +     | OQ859731                 | H109_phase1 – OQ862846;<br>H109_phase2 – OQ862847 |
| H110        | -                         | W5/stone/p                                            | 4.08.2019                                      | +     | OQ859732                 | OQ862848                                          |
| H111        | -                         | W3/stone/p                                            | 7.07.2019                                      | +     | OQ859733                 | OQ862849                                          |
| H112        | -                         | W3/stone/p                                            | 7.07.2019                                      | +     | OQ859734                 | OQ862850                                          |
| H113        | -                         | W5/Porifera, stone/p                                  | 14.08.2019                                     | +     | OQ859735                 | OQ862851                                          |
| H114        | -                         | W3/stone/p                                            | 7.07.2019                                      | +     | OQ859736                 | OQ862852                                          |
| H115        | -                         | W5/stone/p                                            | 14.08.2019                                     | +     | OQ859737                 | OQ862853                                          |
| H116        | -                         | W3/stone/p                                            | 7.07.2019                                      | +     | OQ859738                 | OQ862854                                          |

|      |   |                                           |                            |   |          |                                                                                                                                                   |
|------|---|-------------------------------------------|----------------------------|---|----------|---------------------------------------------------------------------------------------------------------------------------------------------------|
| H117 | 1 | W3/stone/p                                | 7.07.2019                  | + | OQ859739 | OQ862855                                                                                                                                          |
| H118 | - | W4/stone/p                                | 21.08.2019                 | + | OQ859740 | OQ862856                                                                                                                                          |
| H119 | 1 | W3/stone/p                                | 29.06.2019                 | + | OQ859741 | OQ862857                                                                                                                                          |
| H120 | - | W4/stone/p                                | 21.08.2019                 | + | OQ859742 | OQ862858                                                                                                                                          |
| H130 | 1 | W3/stone/p                                | 29.06.2019                 | + | OQ859744 | OQ862862                                                                                                                                          |
| H122 | 2 | W2/Exp/<br>Sl-m-fem x Sl-m -male          | 9.07.2019-<br>17.04.2020   | + | OQ859743 | H122_clone-1:<br>OQ862859;<br>H122_clone-3:<br>OQ862860;<br>H122_clone-8:<br>OQ862861                                                             |
| H135 | - | W1/p                                      | 9.07.2019                  | - | OQ859745 | OQ862863                                                                                                                                          |
| H136 | - | W3/stone/p                                | 12.12.2019 -<br>31.05.2020 | + | OQ859746 | OQ862864                                                                                                                                          |
| H137 | 1 | W3/stone/p                                | 12.12.2019-<br>22.05.2020  | + | OQ859747 | OQ862865                                                                                                                                          |
| H138 | - | W1/p                                      | 28.10.2019-<br>06.02.2021  | + | OQ859748 | OQ862866                                                                                                                                          |
| H139 | 1 | W4/ <i>Fucus</i> sp./p                    | 21.08.2019-<br>6.04.2020   | + | OQ859749 | OQ862867                                                                                                                                          |
| H140 | 3 | W2/W3/stone/Exp/<br>Sl-m fem x Sl-pm male | 9.07.2019-<br>17.08.2020   | + | OQ859750 | H140_phase1 –<br>OQ862868;<br>H140_phase2 –<br>OQ862869                                                                                           |
| H141 | 3 | W1/p                                      | 16.09.2019-<br>31.05.2020  | + | OQ859751 | H141_phase1 –<br>OQ862870;<br>H141_phase2 –<br>OQ862871                                                                                           |
| H142 | - | W1/p                                      | 2019-<br>18.05.2020        | + | OQ859752 | OQ862872                                                                                                                                          |
| H143 | - | W1/p                                      | 16.09.2019-<br>19.07.2020  | + | OQ859753 | OQ862873                                                                                                                                          |
| H144 | - | W2/W3/stone/Exp/<br>Sl-m fem x Sl-pm male | 9.07.2019-<br>31.05.2020   | + | OQ859754 | H144_phase1 –<br>OQ862877;<br>H144_phase2 –<br>OQ862878;<br>H144_clone-3:<br>OQ862874;<br>H144_clone-7:<br>OQ862875;<br>H144_clone-8:<br>OQ862876 |
| H145 | - | W1/p                                      | 16.09.2019-<br>6.04.2020   | + | OQ859755 | OQ862879                                                                                                                                          |
| H148 | 4 | W1/p                                      | 28.10.2019-<br>31.05.2020  | + | OQ859756 | OQ862880                                                                                                                                          |
| H149 | 3 | W2/W3/stone/Exp<br>Sl-pm-fem x Sl-m-male  | 9.07.2019-<br>23.01.2021   | + | OQ859757 | H149_phase1 –<br>OQ862881;<br>H149_phase2 –<br>OQ862882                                                                                           |
| H150 | 3 | W2/W3/stone/Exp/                          | 9.07.2019-                 | + | OQ859758 | H150_phase1 –                                                                                                                                     |

|      |   |                                               |                           |   |          |                                                         |
|------|---|-----------------------------------------------|---------------------------|---|----------|---------------------------------------------------------|
|      |   | Sl-pm-fem x Sl-m male                         | 17.08.2020                |   |          | OQ862883;<br>H150_phase2 –<br>OQ862884                  |
| H151 | 3 | W2/W3/stone/Exp/<br>Sl-m-fem x Sl-pm-<br>male | 9.07.2019-<br>15.06.2020  | + | OQ859759 | H151_phase1 –<br>OQ862885;<br>H151_phase2 –<br>OQ862886 |
| H152 | 1 | W3/stone/p                                    | 12.12.2019-<br>17.08.2020 | + | OQ859760 | OQ862887                                                |
| H153 | - | W2/W3/stone/Exp/<br>Sl-m-fem x Sl-pm-<br>male | 9.07.2019-<br>6.04.2020   | + | OQ859761 | OQ862888                                                |
| H154 | - | W1/p                                          | 2019-<br>31.05.2020       | + | OQ859762 | OQ862889                                                |
| H155 | 3 | W1/p                                          | 16.09.2019-<br>17.08.2020 | + | OQ859763 | H155_phase1 –<br>OQ862890;<br>H155_phase2 –<br>OQ862891 |
| H156 | - | W5/stone/p                                    | 14.08.2019-<br>14.03.2020 | + | OQ859764 | OQ862892                                                |
| H157 | 3 | W2/W3/stone/Exp/<br>Sl-m-fem x Sl-pm-<br>male | 9.07.2019-<br>31.05.2020  | + | OQ859765 | H157_phase1 –<br>OQ862893;<br>H157_phase2 –<br>OQ862894 |
| H158 | 3 | W2/W3/stone/Exp/<br>Sl-pm-fem x Sl-m-<br>male | 9.07.2019-<br>17.08.2020  | + | OQ859766 | H158_phase1 –<br>OQ862895;<br>H158_phase2 –<br>OQ862896 |
| H159 | 3 | W2/W3/stone/Exp/<br>Sl-pm-fem x Sl-m-<br>male | 9.07.2019-<br>23.01.2021  | + | OQ859767 | H159_phase1 –<br>OQ862897;<br>H159_phase2 –<br>OQ862898 |
| H160 | - | W3/stone/p                                    | 7.07.2019-<br>31.05.2020  | + | OQ859768 | OQ862899                                                |
| H161 | - | W1/p                                          | 28.10.2019-<br>12.04.2020 | - | OQ859769 | H161_phase1 –<br>OQ862900;<br>H161_phase2 –<br>OQ862901 |
| H162 | - | W1/p                                          | 2019-<br>18.05.2020       | - | OQ859770 | OQ862902                                                |
| H163 | 3 | W2/W3/stone/Exp/<br>Sl-pm-fem x St-m-male     | 9.07.2019-<br>18.05.2020  | + | OQ859771 | -                                                       |
| H164 | 4 | W1/p                                          | 16.09.2019-<br>05.02.2021 | + | OQ859772 | OQ862903                                                |
| H166 | - | W3/p                                          | 7.07.2019-<br>18.08.2020  | + | OQ859773 | OQ862904                                                |
| H167 | - | W7/red algae/p                                | 2.08.2019-<br>17.02.2021  | + | OQ859774 | OQ862905                                                |
| H168 | 3 | W2/W3/stone/Exp/<br>Sl-m-fem x Sl-pm-male     | 9.07.2019-<br>20.01.2021  | + | OQ859775 | H168_phase1 –<br>OQ862906;<br>H168_phase2 –<br>OQ862907 |
| H169 | 1 | W3/stone/p                                    | 12.12.2019-               | + | OQ859776 | OQ862908                                                |

|      |   |                                                         |                            |   |          |                                                         |
|------|---|---------------------------------------------------------|----------------------------|---|----------|---------------------------------------------------------|
|      |   |                                                         | 31.05.2020                 |   |          |                                                         |
| H170 | 3 | W2/W3/stone/Exp/<br>SI-pm-fem x SI-m-male               | 9.07.2019-<br>18.05.2020   | + | OQ859777 | H170_phase1 –<br>OQ862909;<br>H170_phase2 –<br>OQ862910 |
| H171 | - | W3/stone/p                                              | 7.07.2019-<br>6.04.2020    | + | OQ859778 | OQ862911                                                |
| H172 | - | W1/p                                                    | 2019-<br>31.05.2020        | + | OQ859779 | OQ862912                                                |
| H173 | - | W3/stone/p                                              | 7.07.2019-<br>31.05.2020   | + | OQ859780 | OQ862913                                                |
| H174 | - | W3/stone/p                                              | 7.07.2019-<br>31.05.2020   | + | OQ859781 | OQ862914                                                |
| H175 | - | W3/stone/p                                              | 7.07.2019-<br>30.03.2020   | + | OQ859782 | OQ862915                                                |
| H176 | - | W7/stone/p                                              | 14.08.2019-<br>6.04.2020   | + | OQ859783 | OQ862916                                                |
| H177 | - | W3/stone/p                                              | 7.07.2019-<br>31.05.2020   | + | OQ859784 | OQ862917                                                |
| H178 | - | W1/p                                                    | 2019-<br>31.05.2020        | + | OQ859785 | OQ862918                                                |
| H179 | 4 | W5/stone/p                                              | 14.08.2019-<br>24.07.2020  | + | OQ859786 | H179_phase1 –<br>OQ862919;<br>H179_phase2 –<br>OQ862920 |
| H180 | - | W5/Porifera over<br>stone/p                             | 14.08.2019-<br>31.05.2020  | + | OQ859787 | OQ862921                                                |
| H182 | 4 | W1/p                                                    | 16.09.2019-<br>07.02.2021  | + | OQ859788 | OQ862922                                                |
| H184 | - | W1/p                                                    | 28.10.2019-<br>12.04.2020  | + | OQ859789 | OQ862923                                                |
| H231 | 2 | W5/stone/p                                              | 12.08.2020-<br>21.09.2020  | + | OQ859790 | OQ862924                                                |
| H232 | - | W8/ <i>Fucus</i> sp./p                                  | 12.08.2020                 | + | OQ859791 | H232_phase1 –<br>OQ862925;<br>H232_phase2 –<br>OQ862926 |
| H233 | - | W2/male=(H159+H14<br>0)/Exp F2/SI-m-fem x<br>SI-F1-male | 08.07.2020-<br>08.08.2020  | + | OQ859792 | OQ862927                                                |
| H235 | - | W6/stone/p                                              | 12.08.2020-<br>5.03.2021   | + | OQ859793 | OQ862928                                                |
| H236 | - | W2/male=(H159+H14<br>0)/Exp F2/SI-m-fem x<br>SI-F1-male | 08.07.2020-<br>08.08.2020  | + | OQ859794 | OQ862929                                                |
| H237 | - | W5/stone/p                                              | 12.08.2020-<br>21.01.2021  | + | OQ859795 | OQ862930                                                |
| H238 | - | W2/Exp/<br>SI-m x SI-m                                  | 08.07.2020 -<br>09.08.2020 | + | OQ859796 | H238_phase1 –<br>OQ862931;<br>H238_phase2 –<br>OQ862932 |
| H247 | - | W5/stone/p                                              | 12.08.2020                 | + | OQ859797 | H247_phase1 –<br>OQ862933;                              |

|      |   |                                                                      |                            |   |          |                                                         |
|------|---|----------------------------------------------------------------------|----------------------------|---|----------|---------------------------------------------------------|
|      |   |                                                                      |                            |   |          | H247_phase2 –<br>OQ862934                               |
| H248 | - | W9/ <i>Coryna</i> sp. over<br><i>Pectinaria hyperborea</i><br>tube/p | 30.08.2020                 | + | OQ859798 | H248_phase1 –<br>OQ862935;<br>H248_phase2 –<br>OQ862936 |
| H249 | 2 | W2/Exp/<br>St-fem x St-male                                          | 08.07.2020 -<br>20.03.2021 | + | OQ859799 | OQ862937                                                |
| H250 | - | W5/stone/p                                                           | 12.08.2020-<br>5.03.2021   | + | OQ859800 | OQ862938                                                |
| H251 | - | W2/Exp/<br>Sl-m x Sl-m                                               | 08.07.2020 -<br>09.08.2020 | + | OQ859801 | OQ862939                                                |
| H252 | - | W4/stone/p                                                           | 12.08.2020-<br>20.03.2021  | + | OQ859802 | OQ862940                                                |
| H253 | 2 | W8/ <i>Fucus</i> sp./p                                               | 12.08.2020-<br>20.03.2021  | + | OQ859803 | OQ862941                                                |
| H254 | 4 | W5/p                                                                 | 12.08.2020-<br>20.03.2021  | + | OQ859804 | OQ862942                                                |
| H256 | - | W5/stone/p                                                           | 12.08.2020-<br>20.03.2021  | + | OQ859805 | OQ862943                                                |
| H257 | - | W4/stone/p                                                           | 12.08.2020-<br>5.03.2021   | + | OQ859806 | OQ862944                                                |
| H258 | - | W3/stone/p                                                           | 12.08.2020-<br>5.03.2021   | + | OQ859807 | OQ862945                                                |
| H259 | 4 | W5/p                                                                 | 12.08.2020-<br>20.03.2021  | + | OQ859808 | OQ862946                                                |
| H260 | - | W8/ <i>Fucus</i> sp./p                                               | 12.08.2020-<br>5.03.2021   | + | OQ859809 | H260_phase1 –<br>OQ862947;<br>H260_phase2 –<br>OQ862948 |
| H261 | - | W5/stone/p                                                           | 12.08.2020-<br>5.03.2021   | + | OQ859810 | OQ862949                                                |
| H262 | - | W4/stone/p                                                           | 12.08.2020-<br>5.03.2021   | + | OQ859811 | OQ862950                                                |
| H263 | - | W4/stone/p                                                           | 12.08.2020-<br>5.03.2021   | + | OQ859812 | OQ862951                                                |
| H264 | - | W4/stone/p                                                           | 12.08.2020-<br>5.03.2021   | + | OQ859813 | OQ862952                                                |
| H265 | 4 | W5/stone/p                                                           | 12.08.2020-<br>26.01.2021  | + | OQ859814 | OQ862953                                                |
| H266 | - | W6/stone/p                                                           | 12.08.2020-<br>5.03.2021   | + | OQ859815 | OQ862954                                                |
| H267 | - | W1/p                                                                 | 2019-<br>20.03.2021        | + | OQ859816 | OQ862955                                                |
| H268 | - | W4/stone/p                                                           | 12.08.2020-<br>20.03.2021  | + | OQ859817 | OQ862956                                                |
| H269 | - | W3/stone/p                                                           | 12.08.2020-<br>20.03.2021  | + | OQ859818 | OQ862957                                                |
| H270 | - | W4/stone/p                                                           | 12.08.2020-<br>20.03.2021  | + | OQ859819 | OQ862958                                                |
| H271 | - | W5/stone/p                                                           | 12.08.2020-<br>20.03.2021  | + | OQ859820 | H271_phase1 –<br>OQ862959;<br>H271_phase2 –             |

|      |   |                                               |                           |   |          |                                                         |
|------|---|-----------------------------------------------|---------------------------|---|----------|---------------------------------------------------------|
|      |   |                                               |                           |   |          | OQ862960                                                |
| H272 | - | W5/stone/p                                    | 12.08.2020-<br>21.09.2020 | + | OQ859821 | OQ862961                                                |
| H273 | 2 | W2/St/m                                       | 27.06.2020                | + | OQ859822 | OQ862962                                                |
| H276 | 2 | W2/St/m                                       | 27.06.2020                | + | OQ859823 | OQ862963                                                |
| H277 | 2 | W2/Sl/m                                       | 06.2020                   | - | OQ859824 | H277_phase1 –<br>OQ862964;<br>H277_phase2 –<br>OQ862965 |
| H278 | 2 | W2/St/m/fem                                   | 18.06.2020                | + | OQ859825 | OQ862966                                                |
| H279 | 2 | W2/St/m                                       | 27.06.2020                | + | OQ859826 | OQ862967                                                |
| H280 | 2 | W2/St/m                                       | 27.06.2020                | + | OQ859827 | OQ862968                                                |
| H281 | 2 | W2/St/m/fem                                   | 19.06.2020                | + | OQ859828 | OQ862969                                                |
| H282 | 2 | W2/St/m/fem                                   | 19.06.2020                | + | OQ859829 | OQ862970                                                |
| H283 | 2 | W2/St/m                                       | 27.06.2020                | + | OQ859830 | OQ862971                                                |
| H284 | 2 | W2/St/m/male                                  | 19.06.2020                | + | OQ859831 | OQ862972                                                |
| H285 | 2 | W2/St/m/male                                  | 19.06.2020                | + | OQ859832 | OQ862973                                                |
| H286 | 2 | W2/St/m                                       | 18.06.2020                | + | OQ859833 | OQ862974                                                |
| H287 | 2 | W2/Sl/m                                       | 06.2020                   | - | OQ859834 | OQ862975                                                |
| H288 | 2 | W2/St/m                                       | 27.06.2020                | + | OQ859835 | OQ862976                                                |
| H289 | 1 | W3/stone/Sl/p                                 | 2019-2020<br>14.07.2020   | + | OQ859836 | OQ862977                                                |
| H290 | 3 | W2/W3/stone/Exp/<br>Sl-pm-fem x Sl-m male     | 9.07.2019-<br>17.08.2020  | - | OQ859837 | H290_phase1 –<br>OQ862978;<br>H290_phase2 –<br>OQ862979 |
| H291 | 3 | W2/W3/stone/Exp/<br>Sl-pm-fem x Sl-m-<br>male | 9.07.2019-<br>23.01.2021  | - | OQ859838 | H291_phase1 –<br>OQ862980;<br>H291_phase2 –<br>OQ862981 |
| H332 | - | W3/stone/Sl/p                                 | 12.05.2021                | + | OQ859839 | OQ862982                                                |
| H333 | - | W3/stone/p                                    | 12.05.2021                | + | OQ859840 | OQ862983                                                |
| H334 | 4 | W3/stone/Sl/p                                 | 12.05.2021                | + | OQ859841 | OQ862984                                                |
| H335 | 3 | W3/stone/Sl/p                                 | 12.05.2021                | + | OQ859842 | H335_phase1 –<br>OQ862985;<br>H335_phase2 –<br>OQ862986 |
| H336 | 4 | W3/stone/Sl/p                                 | 12.05.2021                | + | OQ859843 | OQ862987                                                |
| H337 | 3 | W3/stone/Sl/p                                 | 12.05.2021                | + | OQ859844 | OQ862988                                                |
| H338 | 3 | W3/stone/p                                    | 12.05.2021                | + | OQ859845 | H338_phase1 –<br>OQ862989;<br>H338_phase2 –<br>OQ862990 |
| H339 | 4 | W3/stone/p                                    | 12.05.2021                | + | OQ859846 | OQ862991                                                |
| H340 | 4 | W3/stone/p                                    | 12.05.2021                | + | OQ859847 | H340_phase1 –<br>OQ862992;<br>H340_phase2 –<br>OQ862993 |
| H341 | 4 | W3/stone/p                                    | 12.05.2021                | + | OQ859848 | OQ862994                                                |
| H346 | 1 | W3/stone/p                                    | 9.06.2021                 | + | OQ859849 | OQ862995                                                |
| H347 | 1 | W3/stone/p                                    | 10.06.2021                | + | OQ859850 | OQ862996                                                |
| H348 | 1 | W3/stone/p                                    | 10.06.2021                | + | OQ859851 | OQ862997                                                |

|      |                             |               |            |   |          |                                                         |
|------|-----------------------------|---------------|------------|---|----------|---------------------------------------------------------|
| H349 | 1                           | W3/stone/p    | 11.06.2021 | + | OQ859852 | OQ862998                                                |
| H355 | 2                           | W3/stone/Sl/p | 31.03.2021 | + | OQ859853 | H355_phase1 –<br>OQ862999;<br>H355_phase2 –<br>OQ863000 |
| H356 | 2                           | W3/stone/Sl/p | 31.03.2021 | + | OQ859854 | OQ863001                                                |
| H357 | 2                           | W3/stone/Sl/p | 31.03.2021 | + | OQ859855 | OQ863002                                                |
| H358 | 2                           | W3/stone/Sl/p | 31.03.2021 | + | OQ859856 | OQ863003                                                |
| H359 | 2                           | W3/stone/Sl/p | 1.04.2021  | + | OQ859857 | OQ863004                                                |
| H360 | -                           | W3/stone/Sl/p | 30.03.2021 | + | OQ859858 | OQ863005                                                |
| S20  | See Prudkovsky et al., 2019 |               |            |   |          | S20_phase1 –<br>OQ863011;<br>S20_phase2 –<br>OQ863012   |
| S25  | See Prudkovsky et al., 2019 |               |            |   |          | S25_phase1 –<br>OQ863013;<br>S25_phase2 –<br>OQ863014   |
