# Supplementary figures and images for: What Does “ITS” Say about Hybridization in Lineages of Sarsia (Corynidae, Hydrozoa) from the White Sea?
Source: MDPI journal article supplement (doi:10.3390/d15050675), 2023-05-17

Figure S1 Photographs of collected specimens (see Table S1). Scale Bar 1 mm.

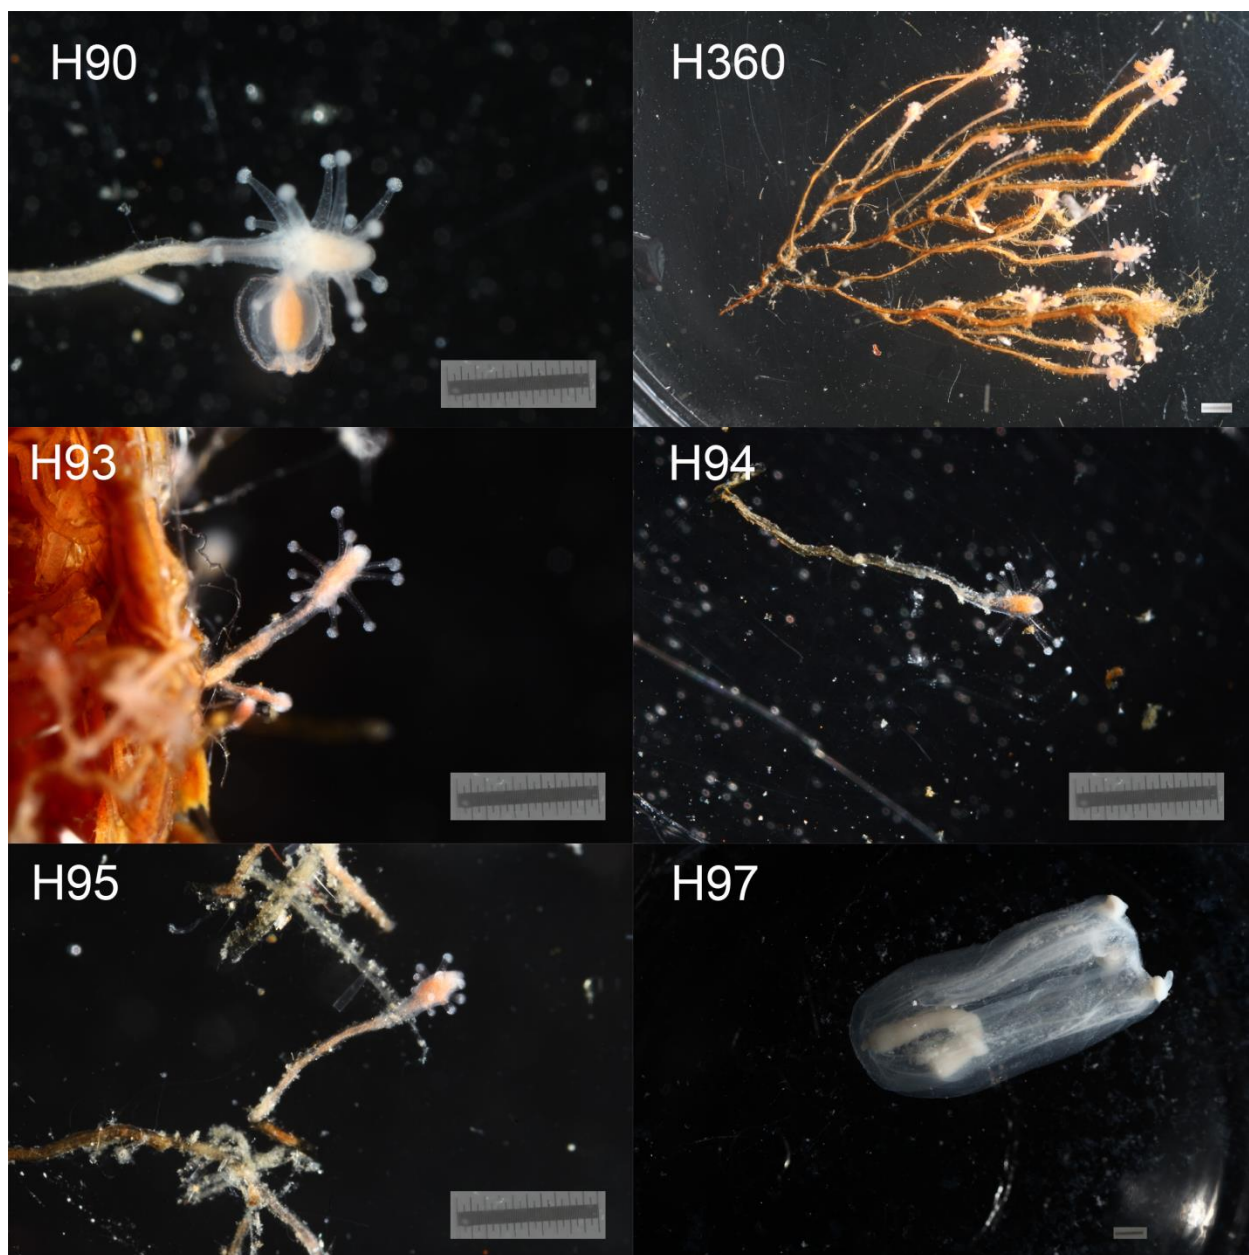

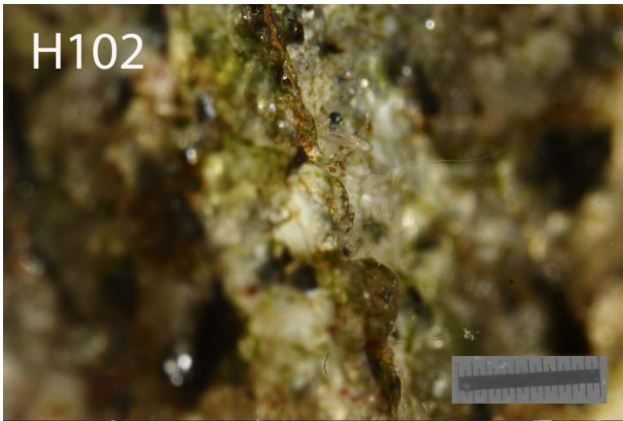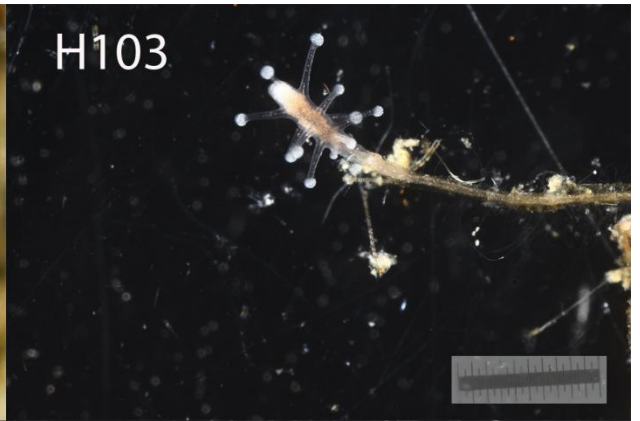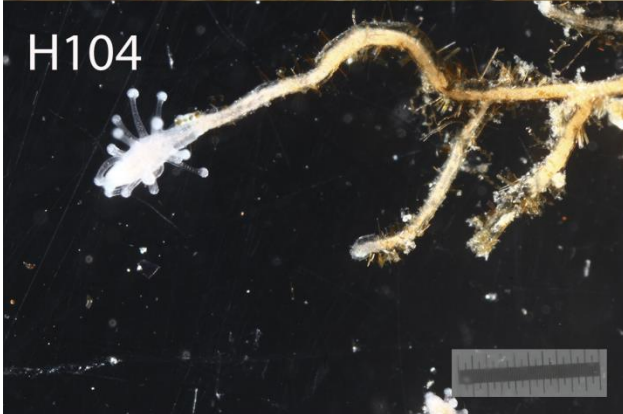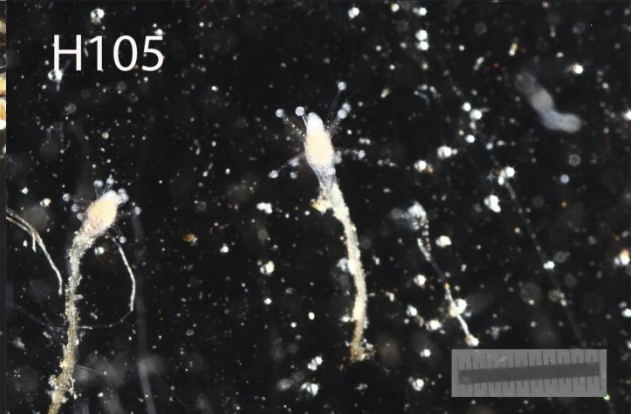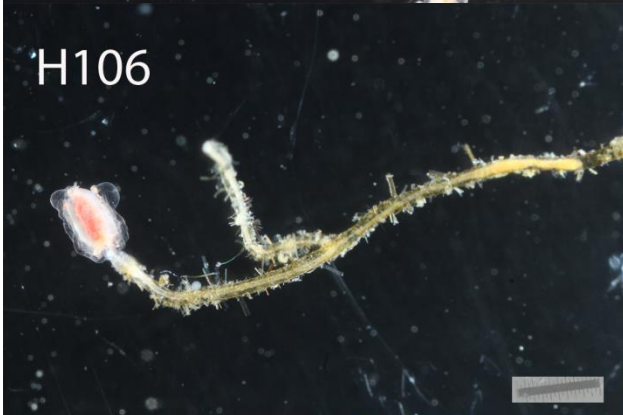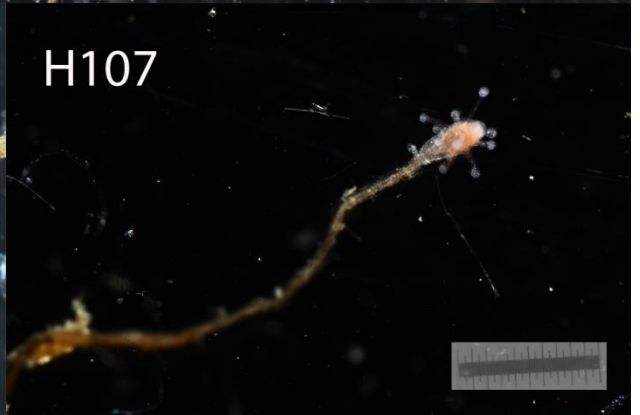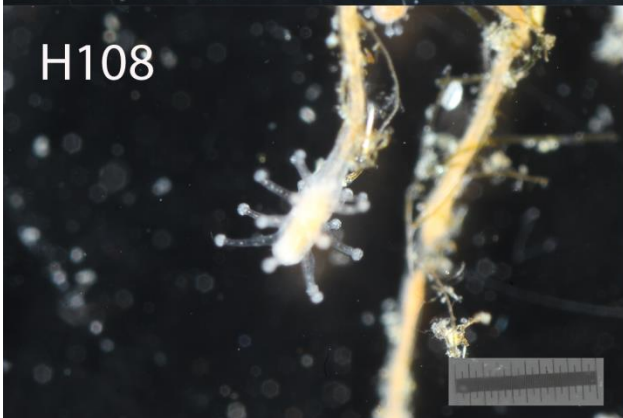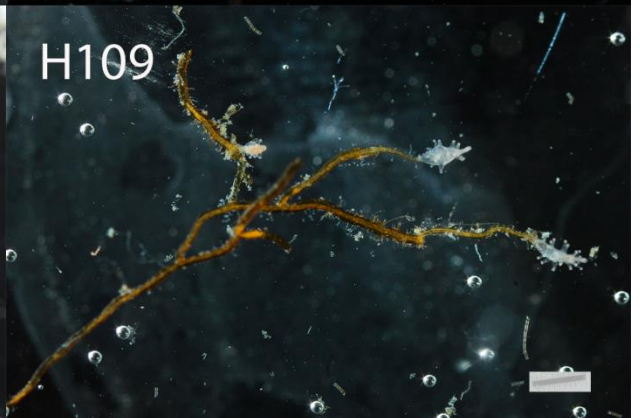



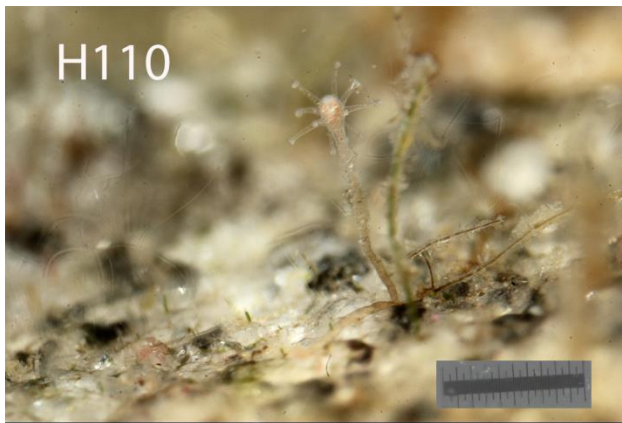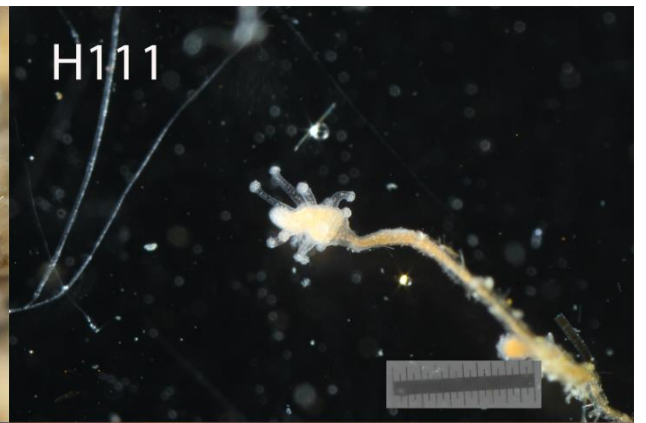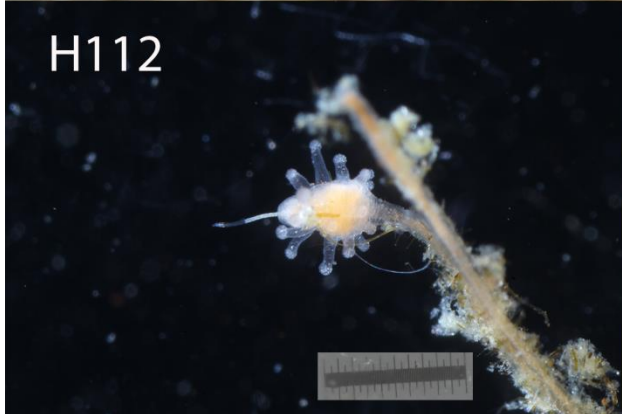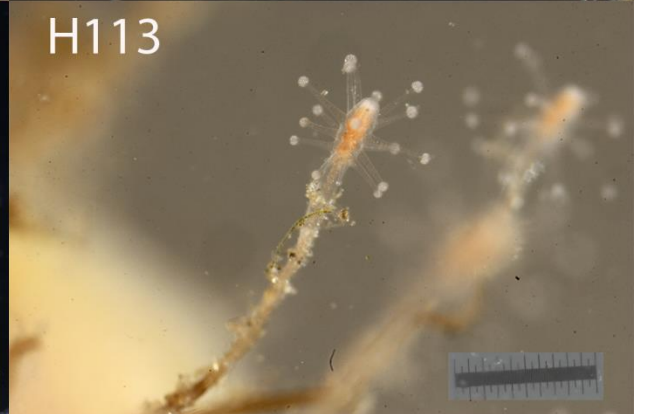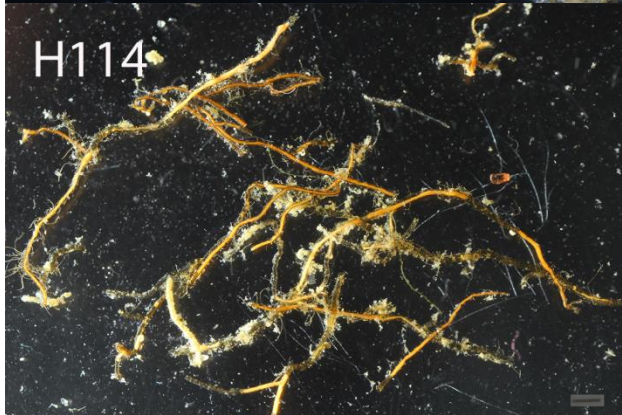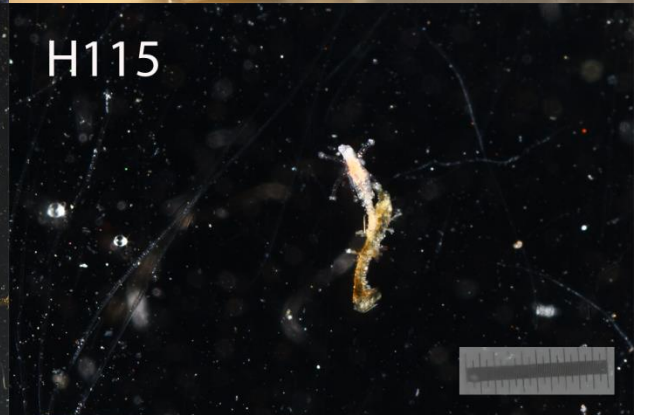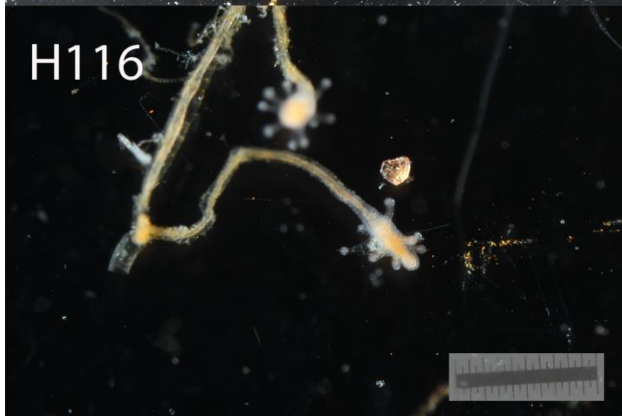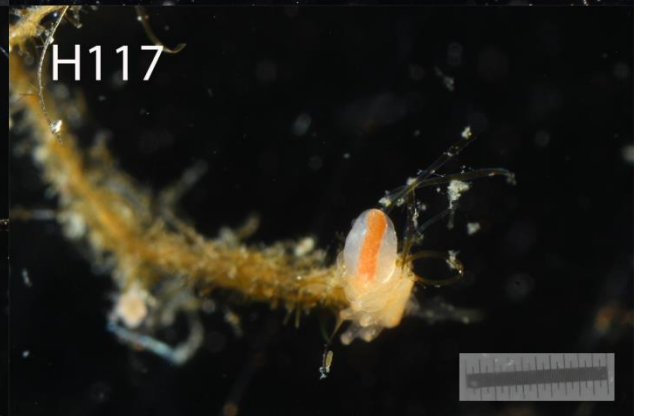

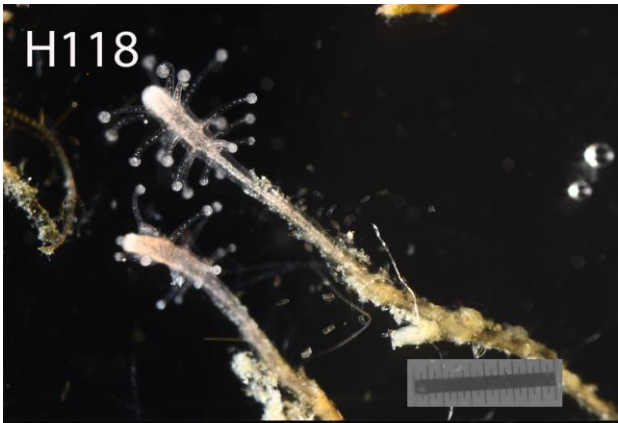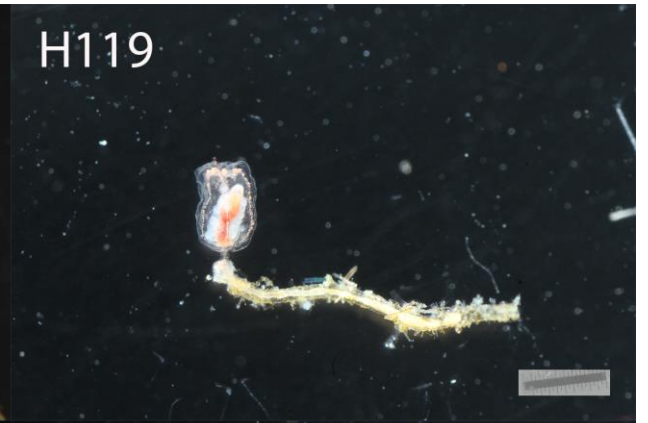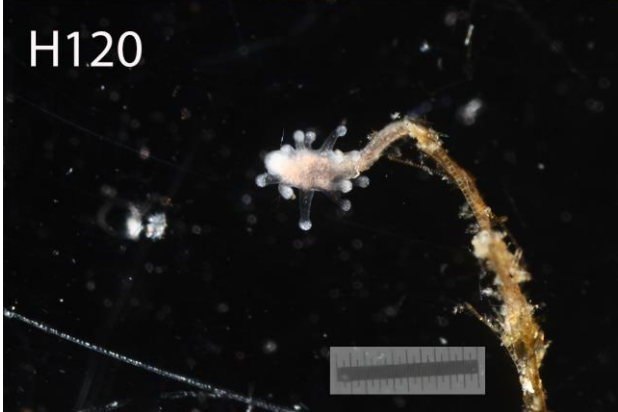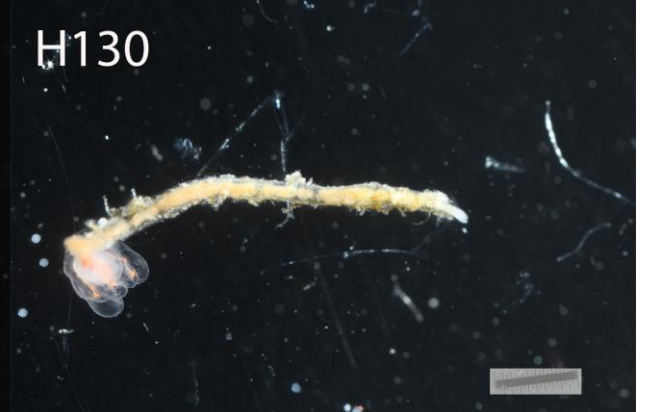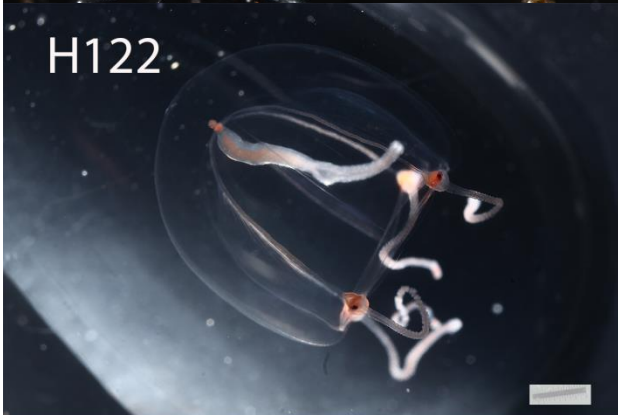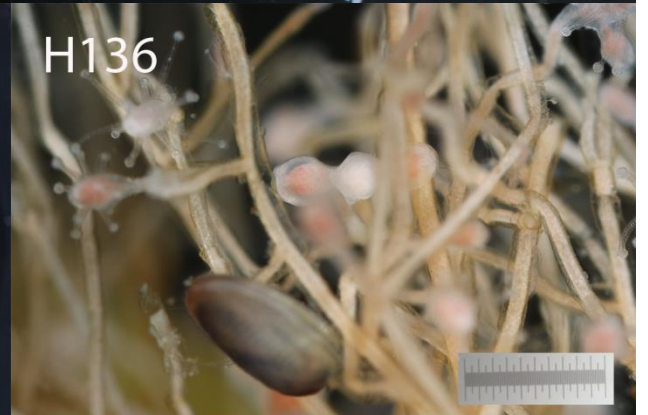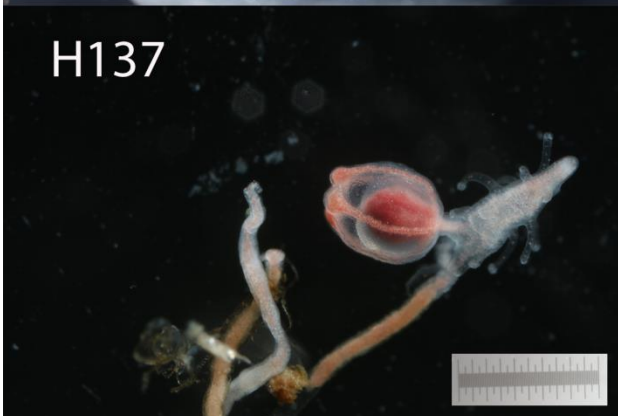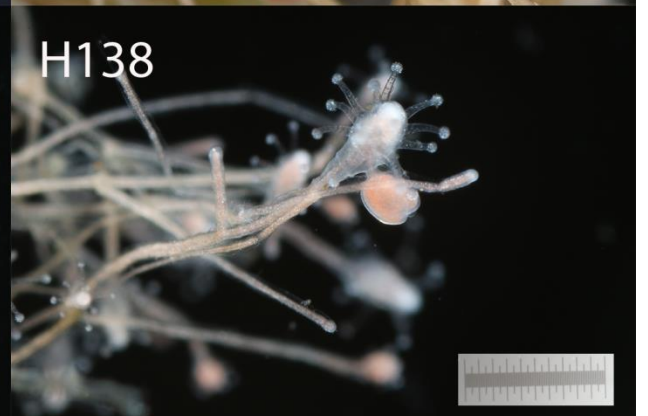



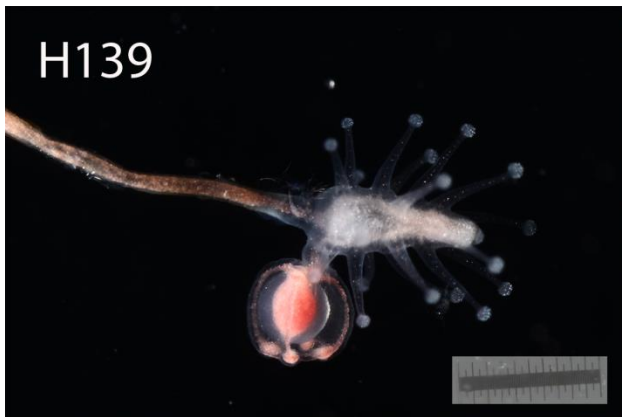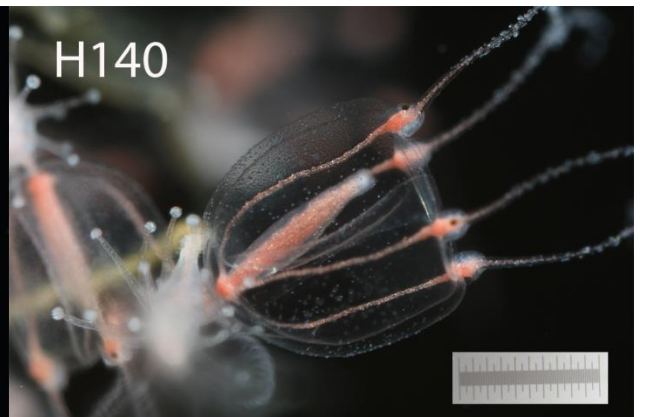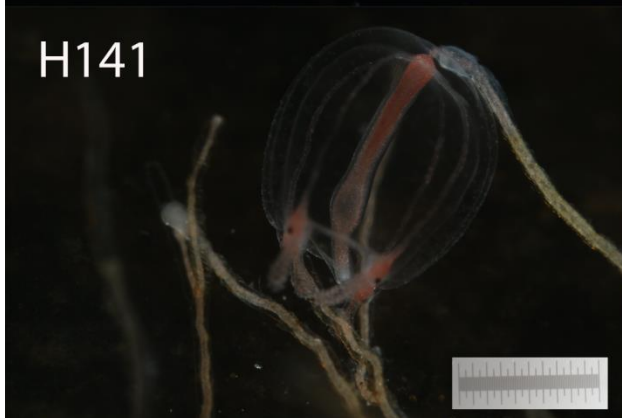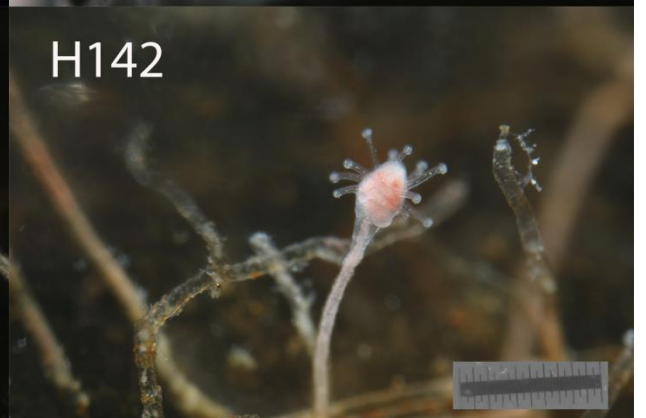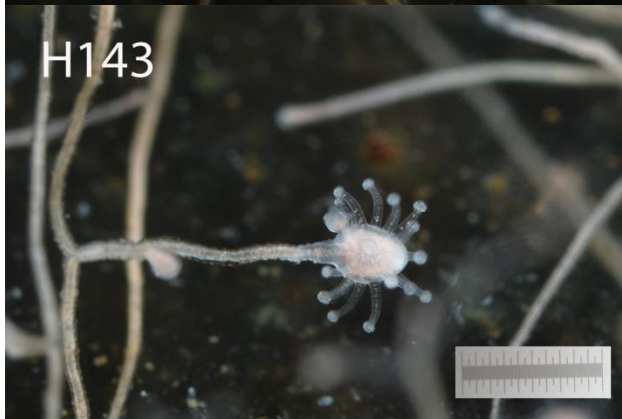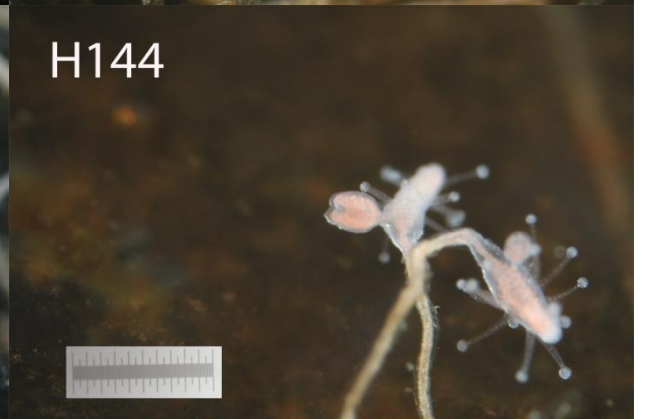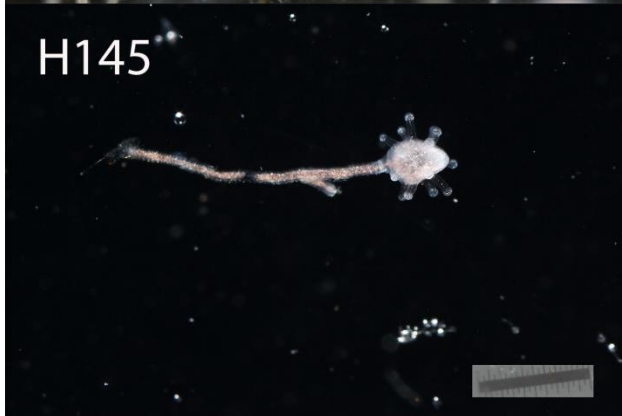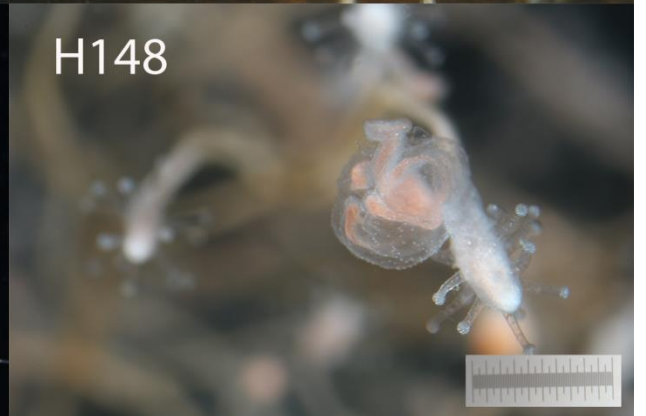

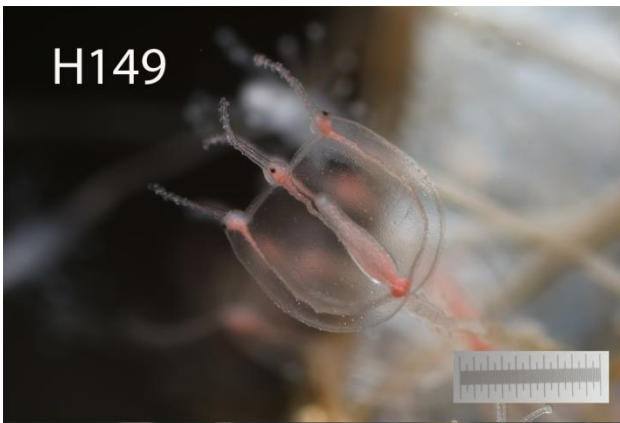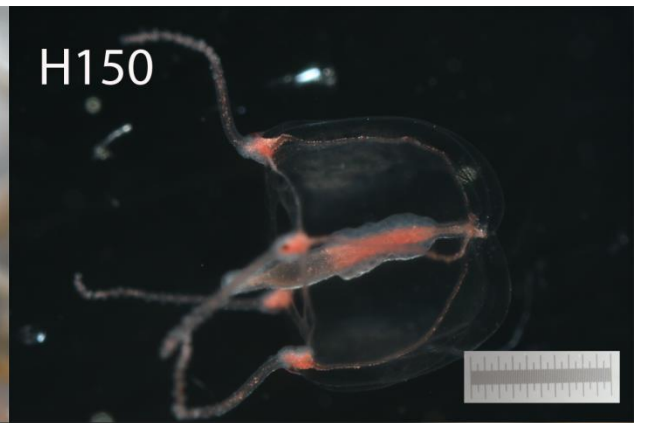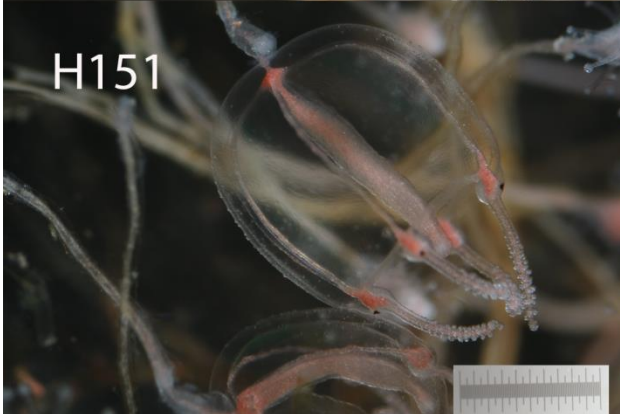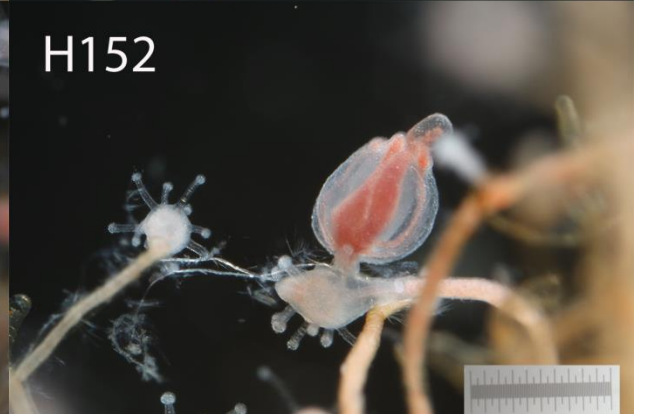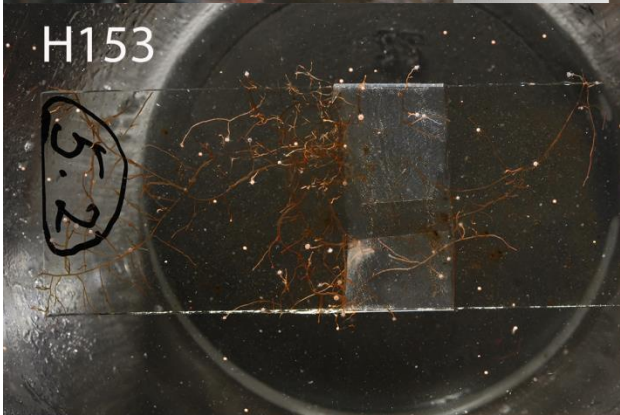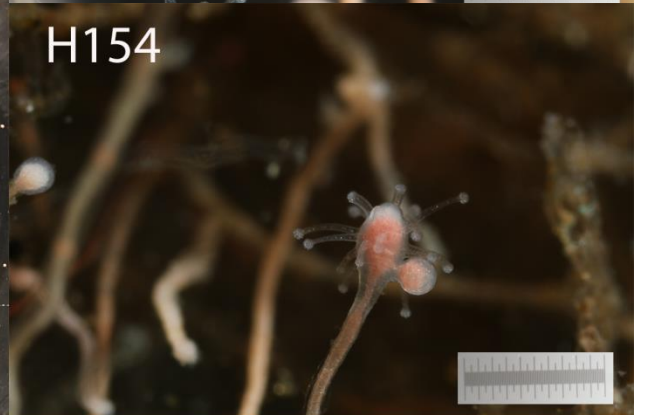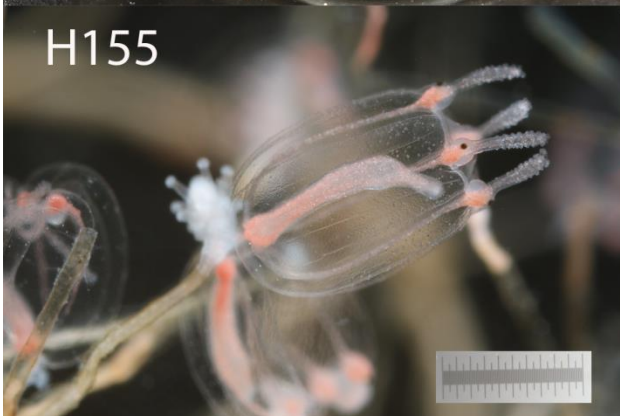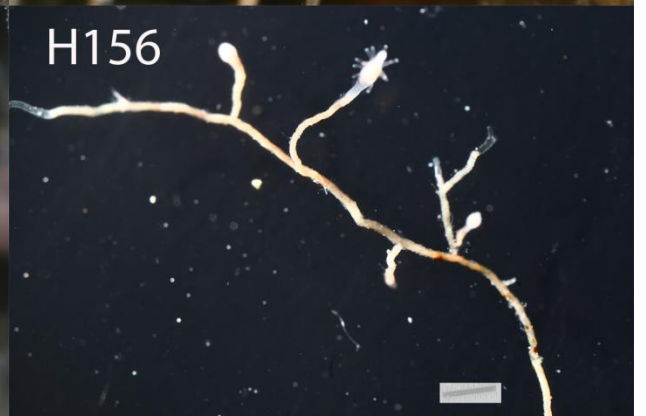



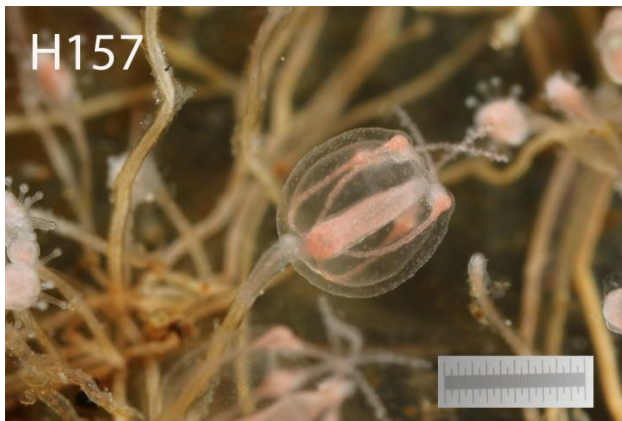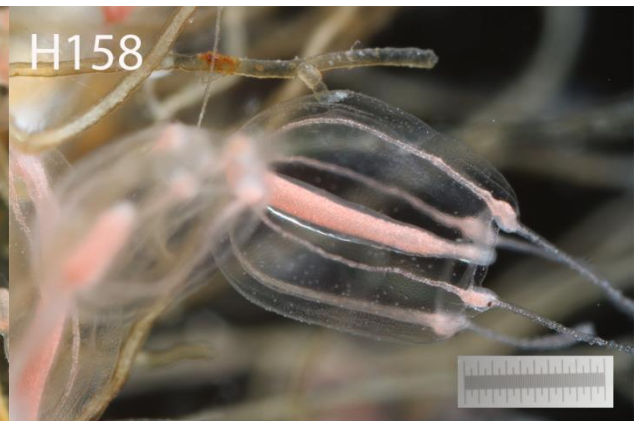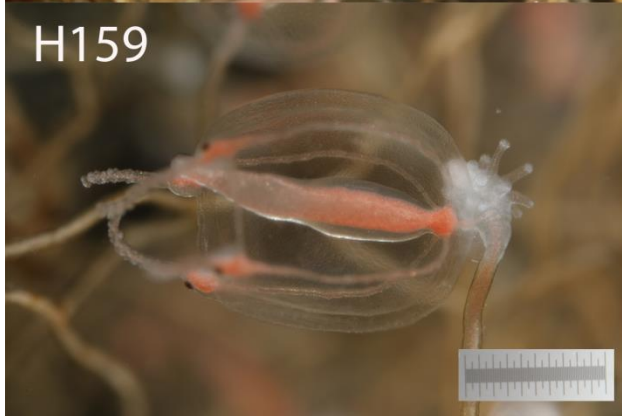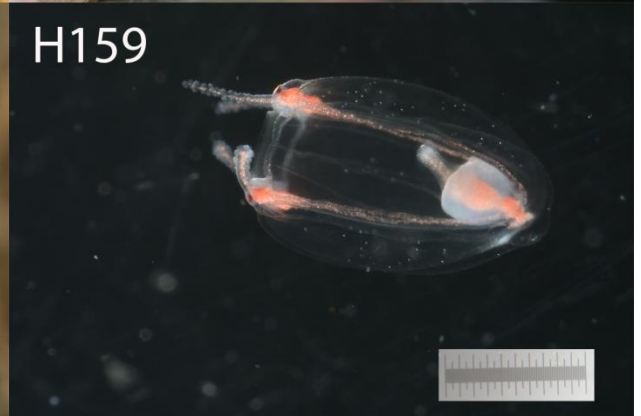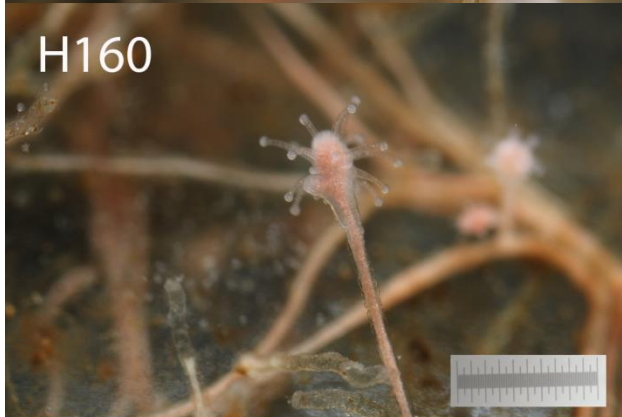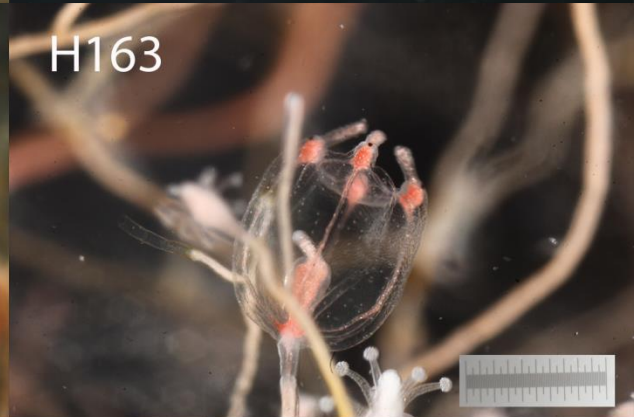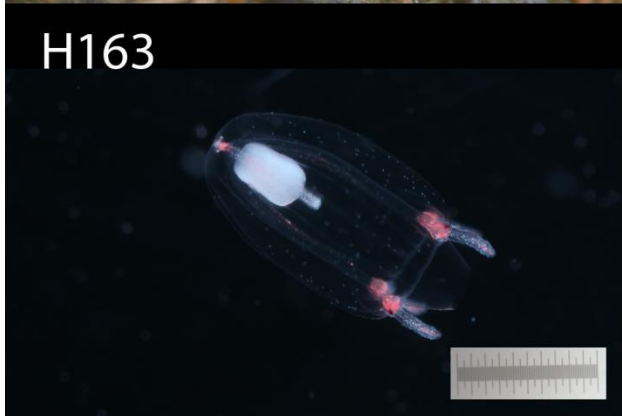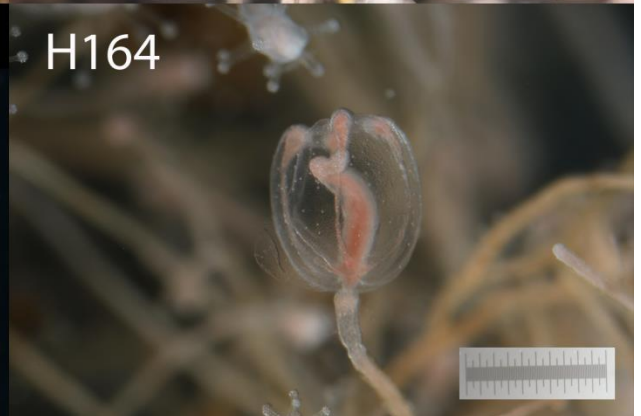

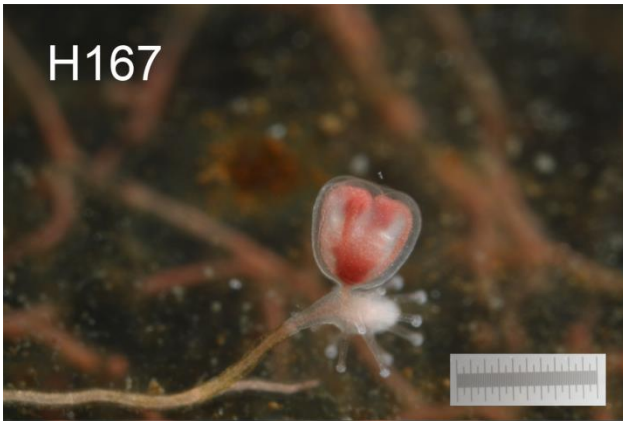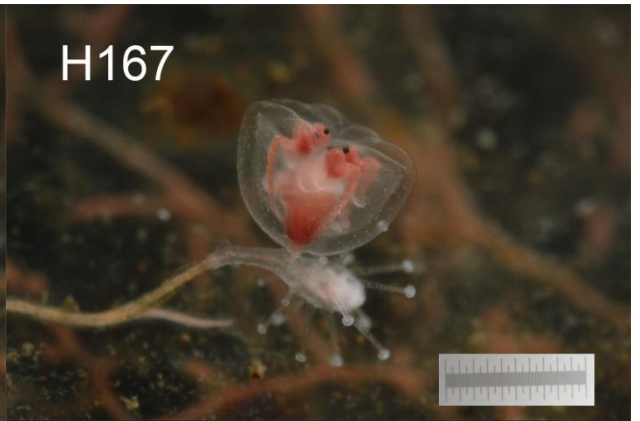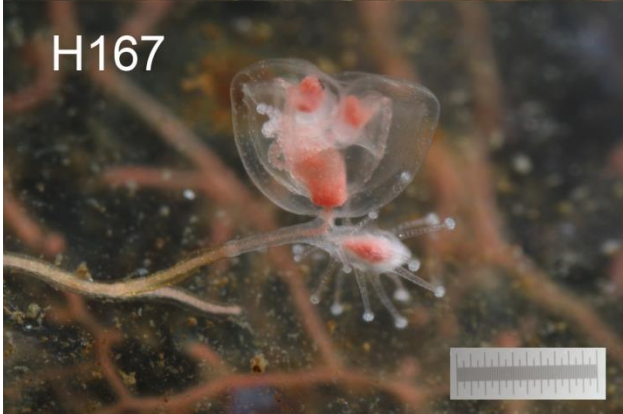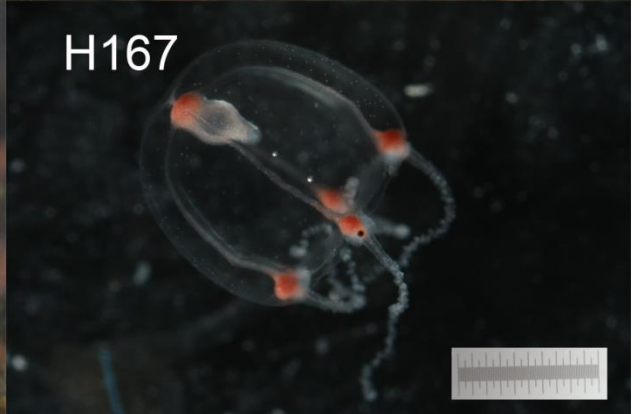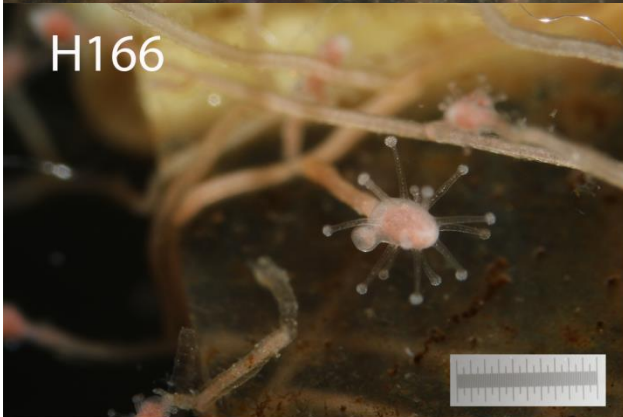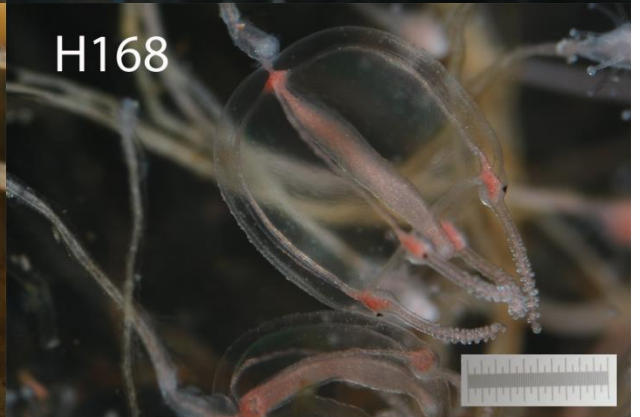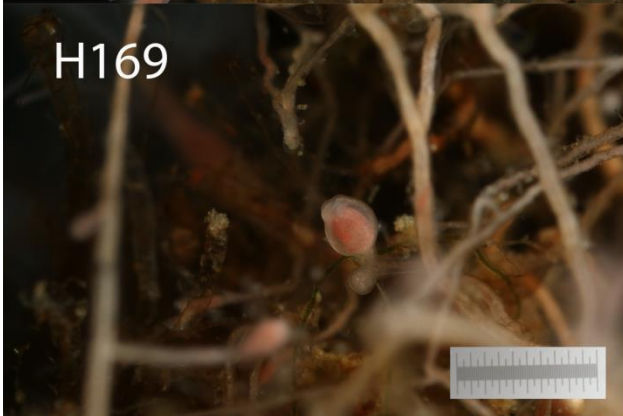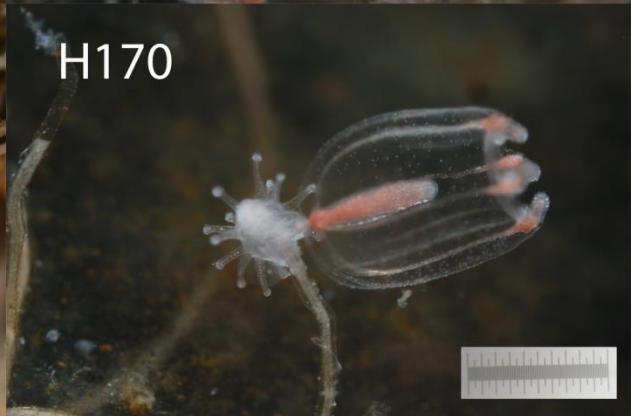



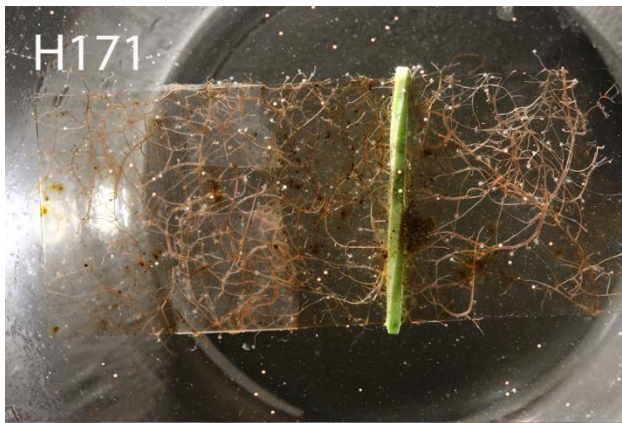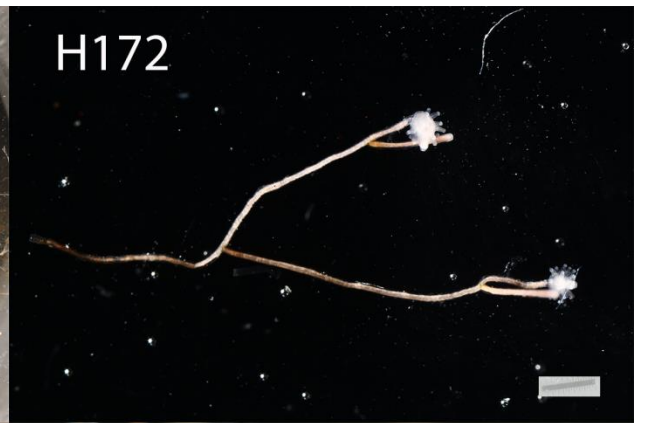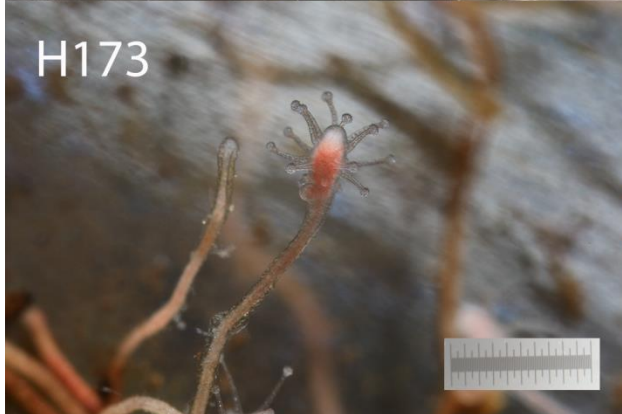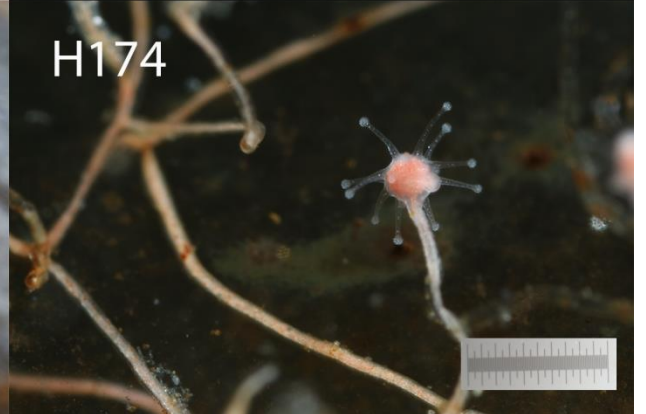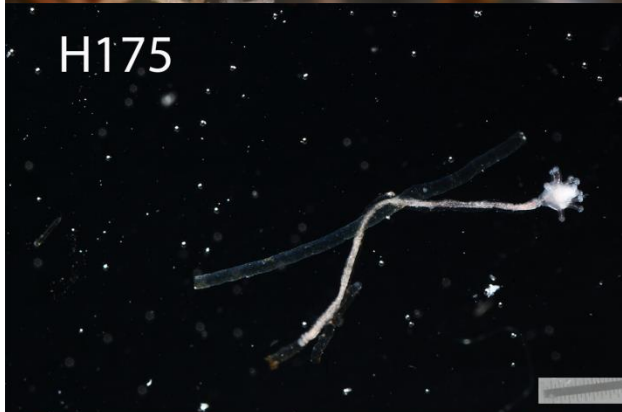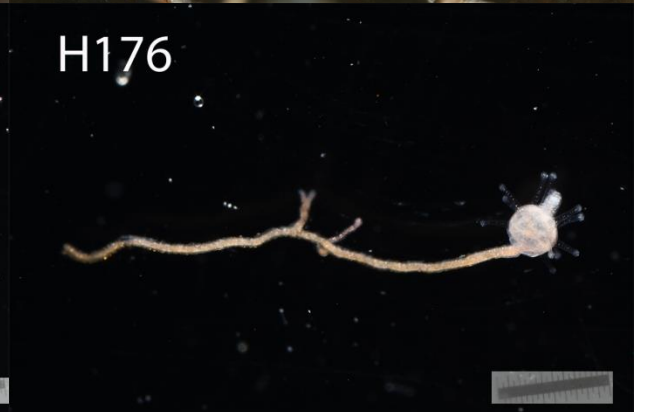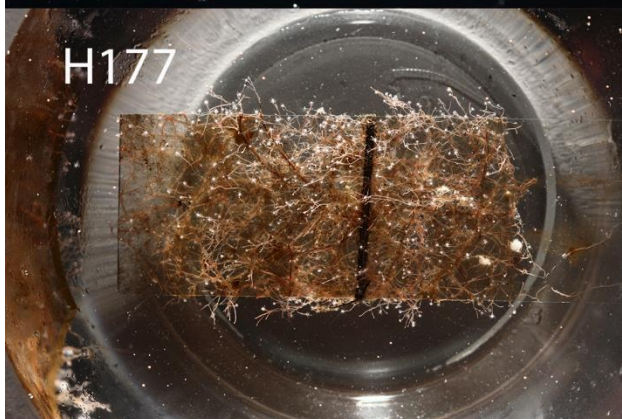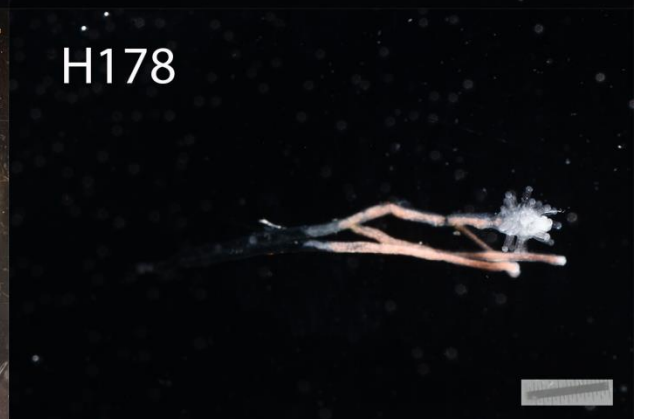

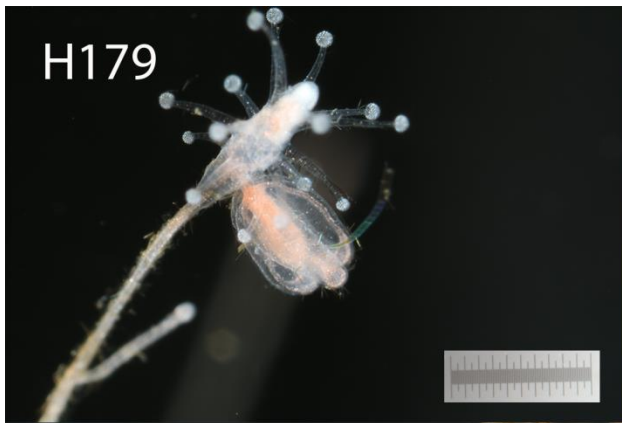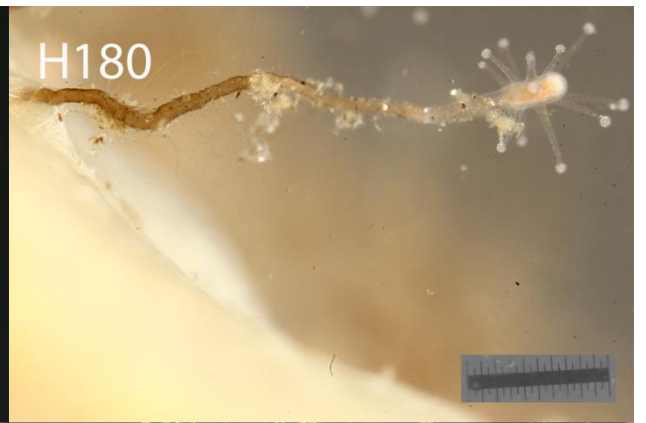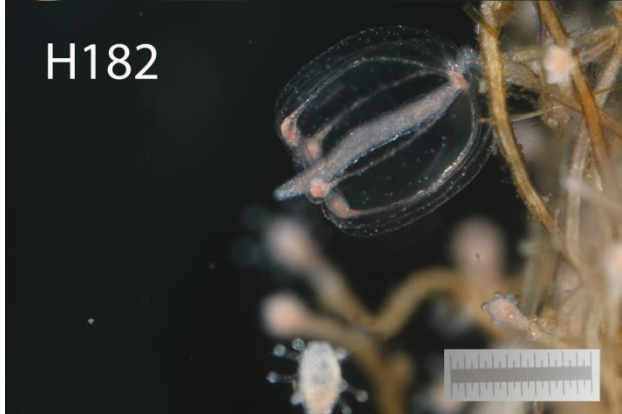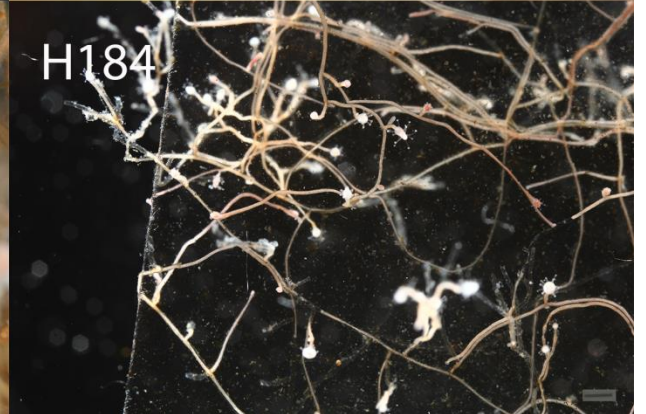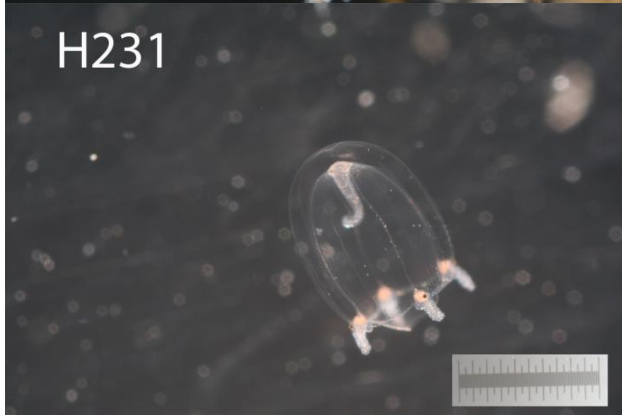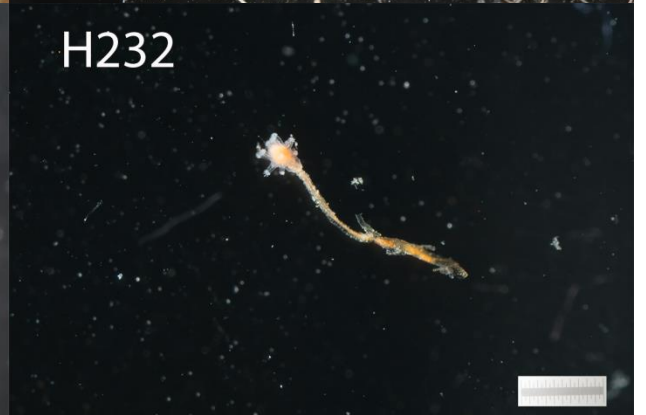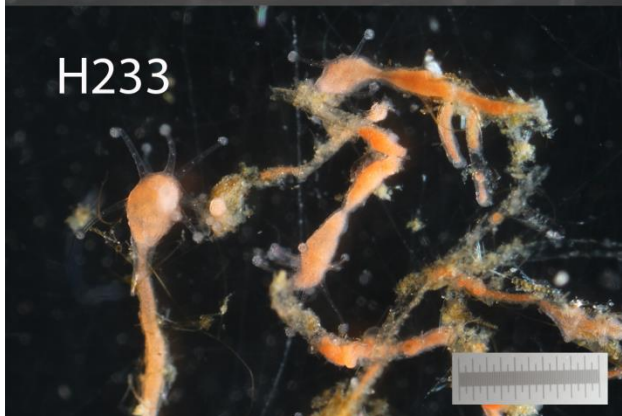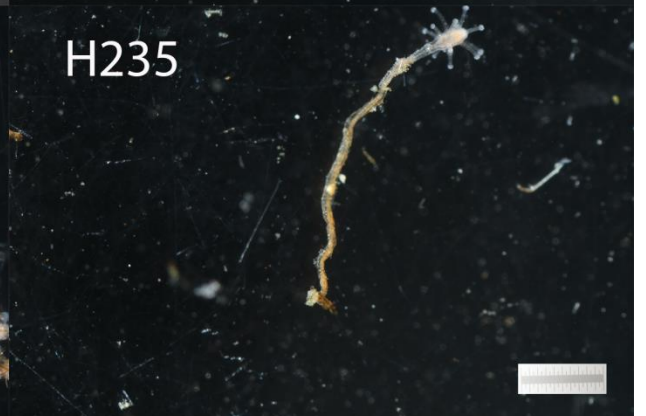



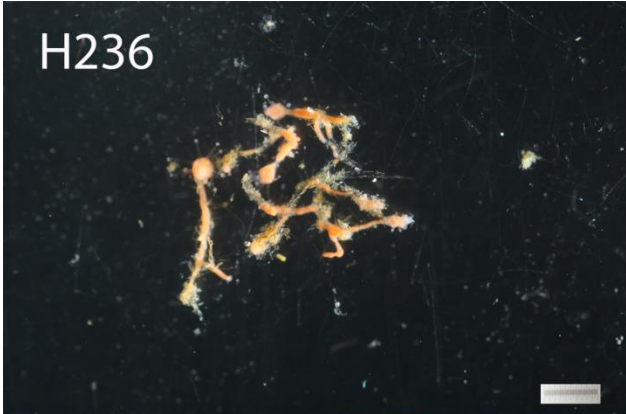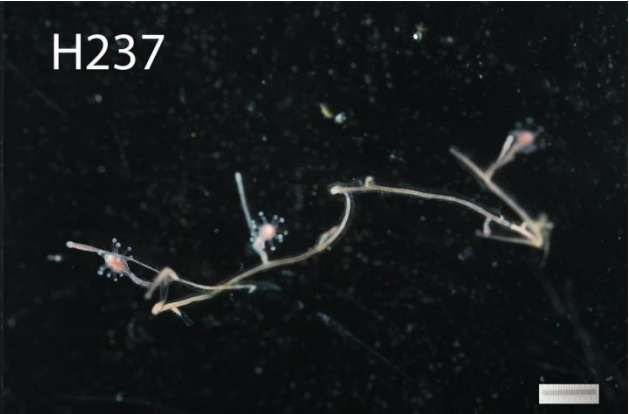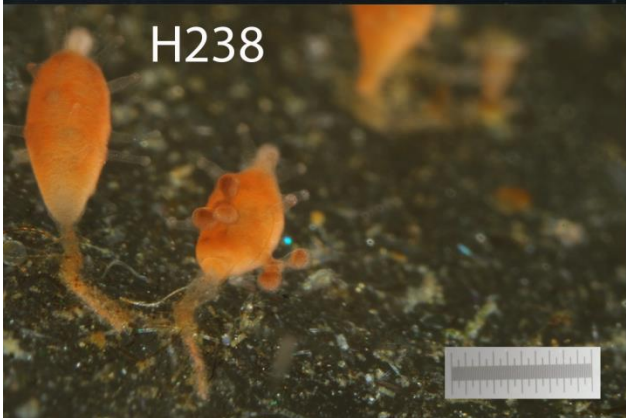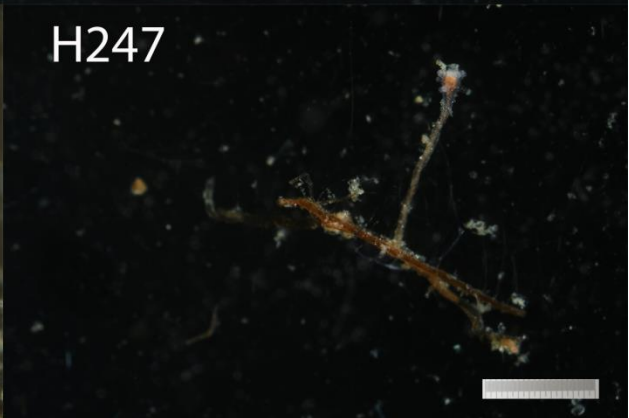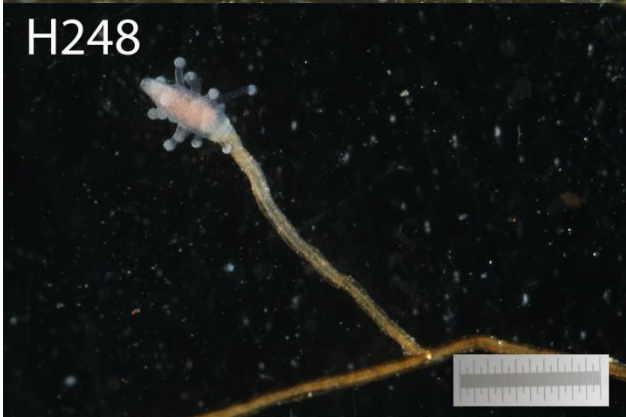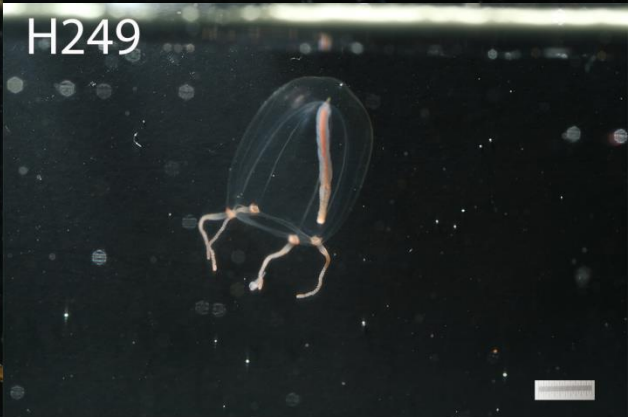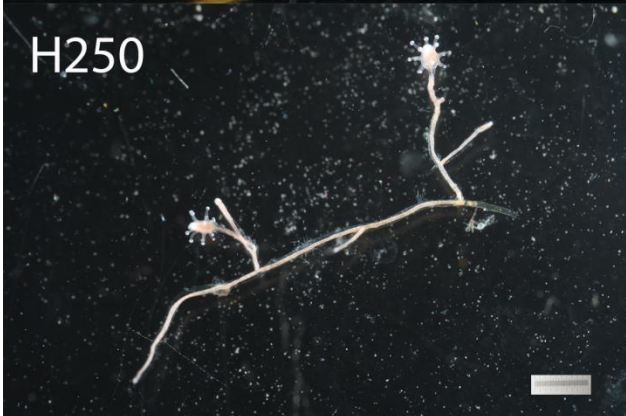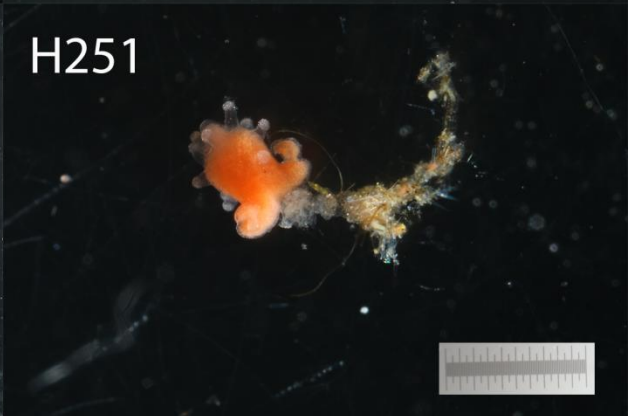

H252

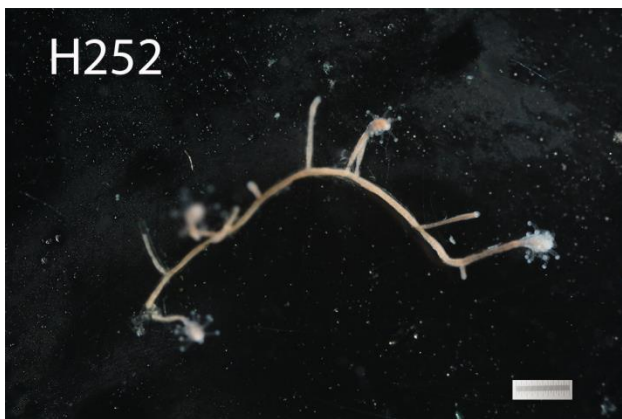

H253

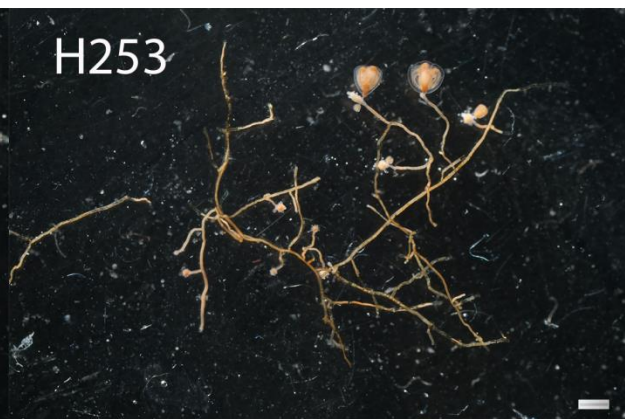

H254

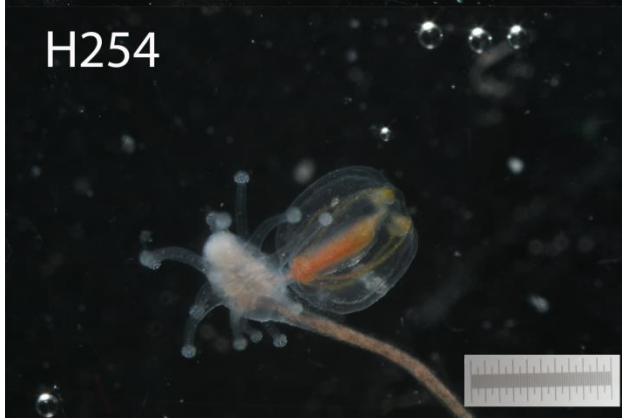

H256

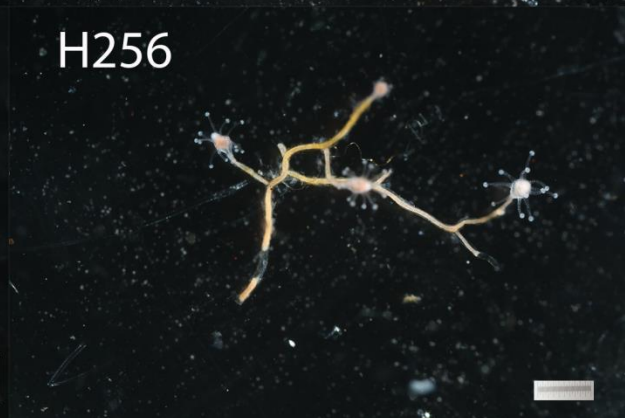

H257

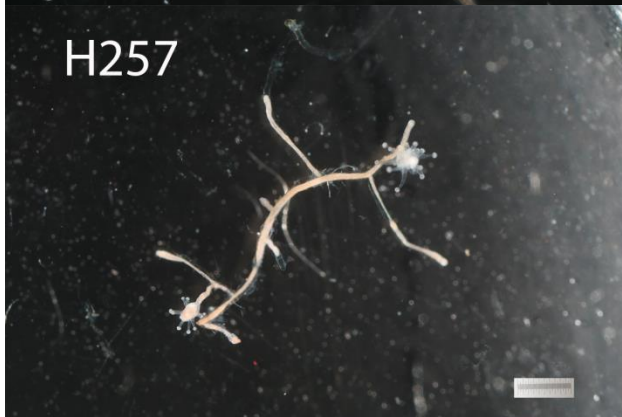

H258

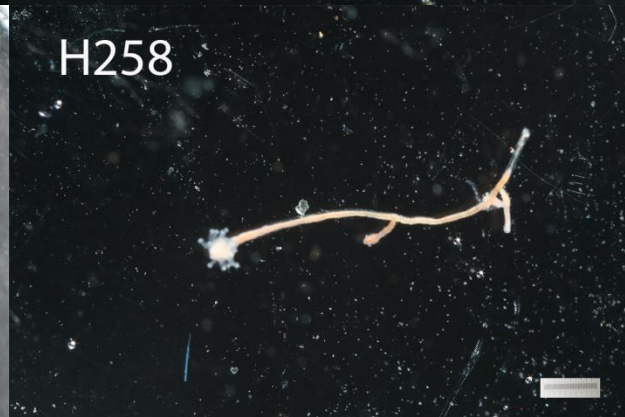

H259

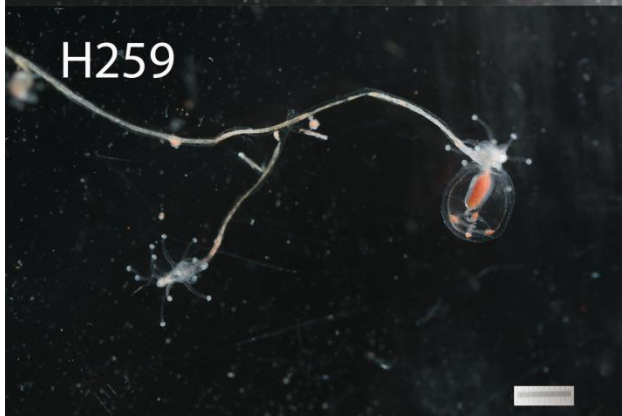

H260

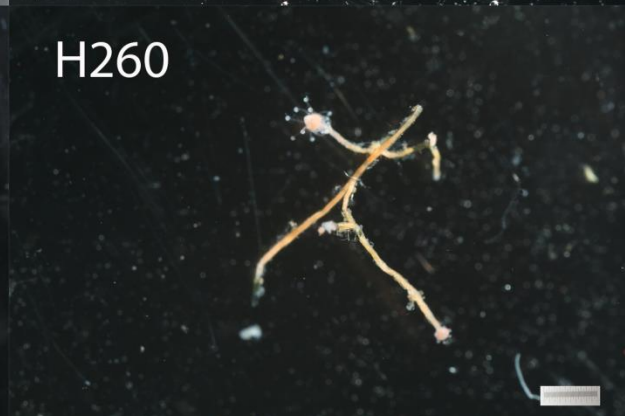



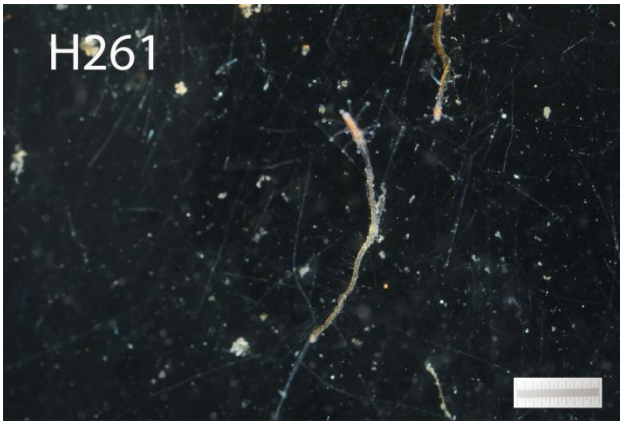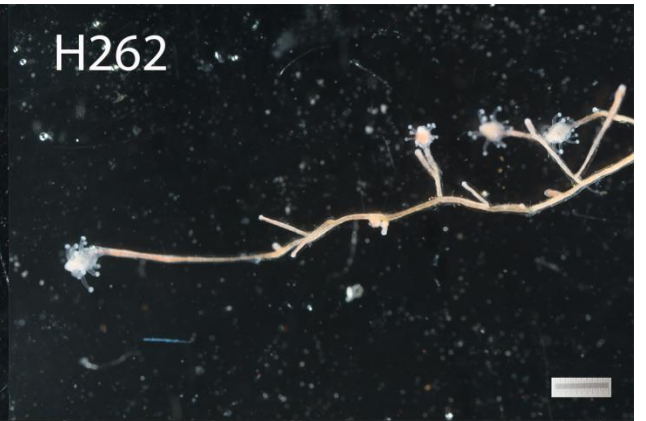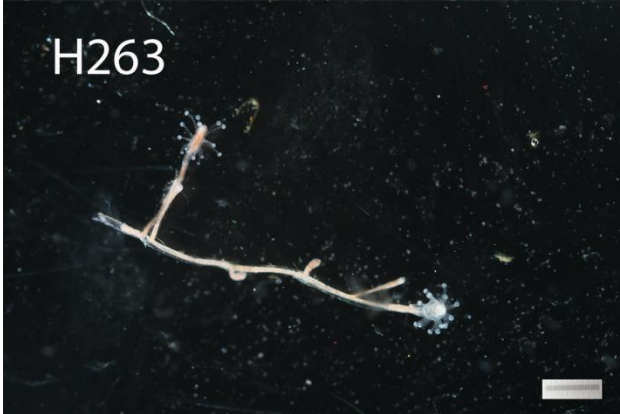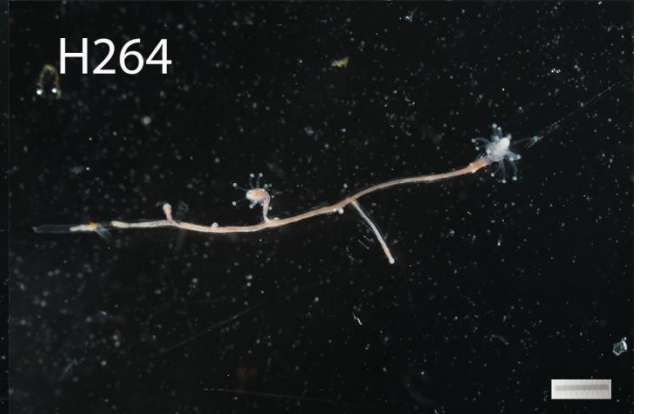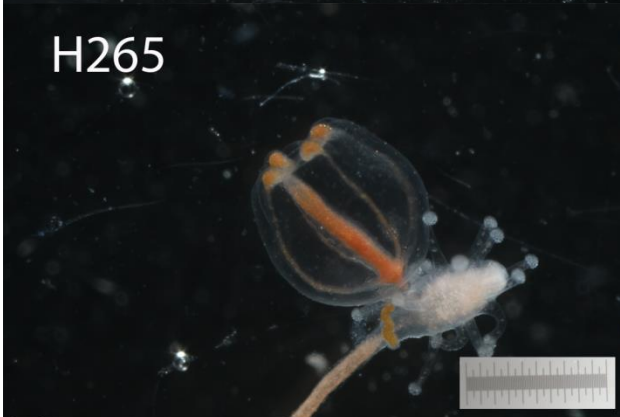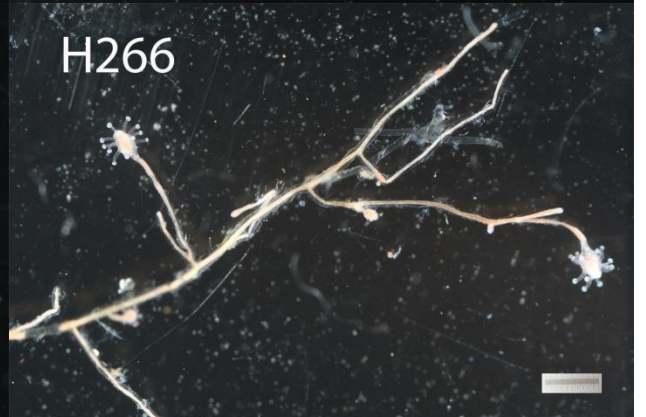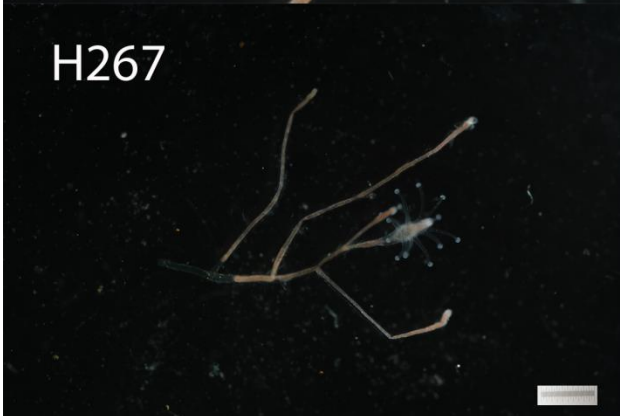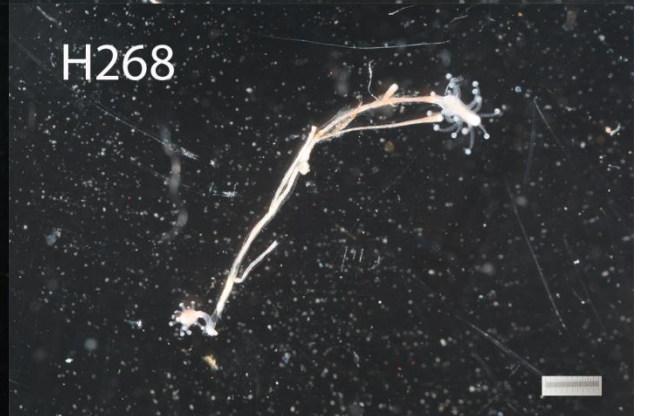

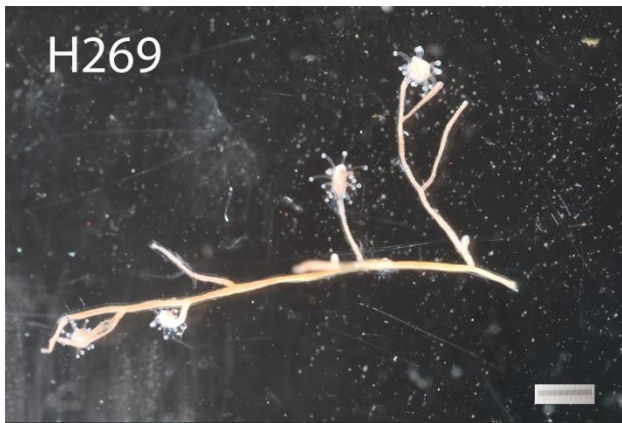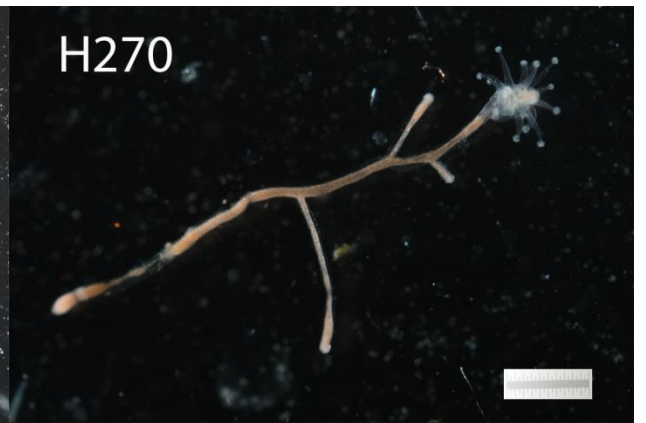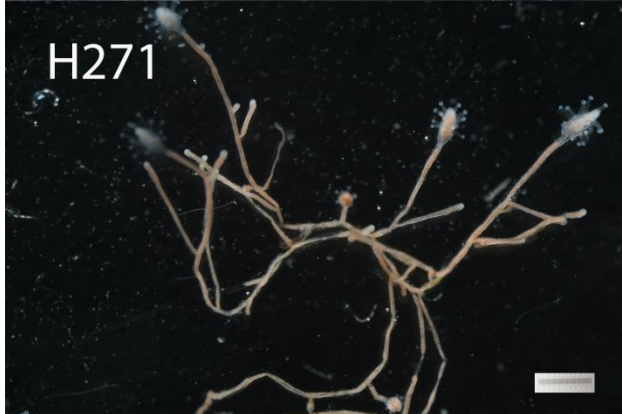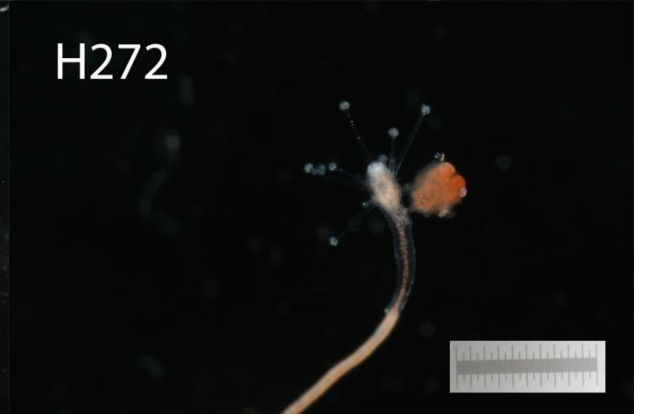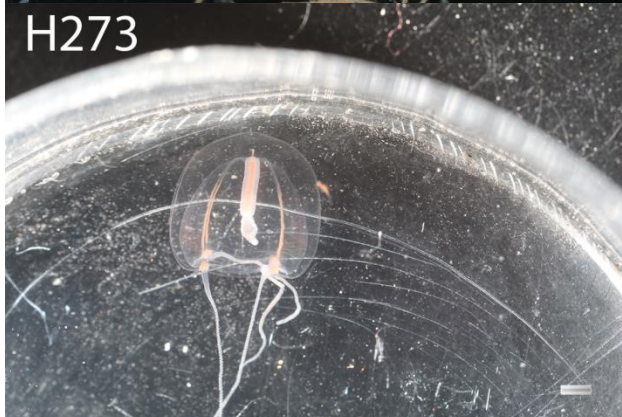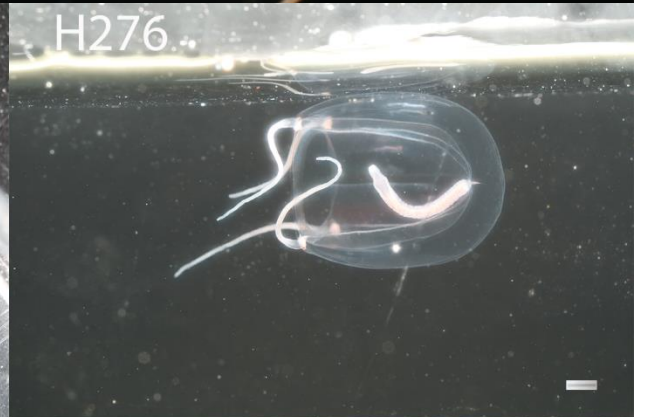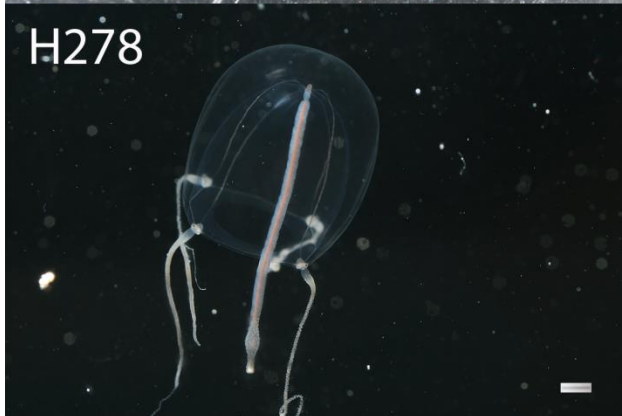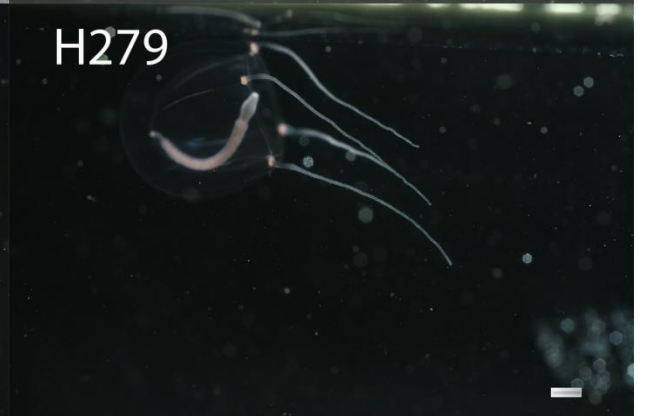



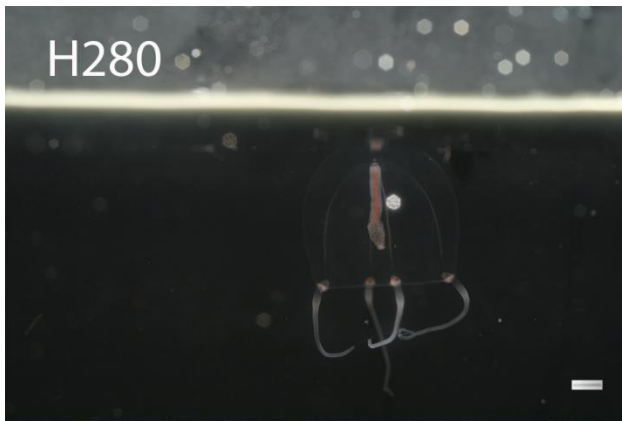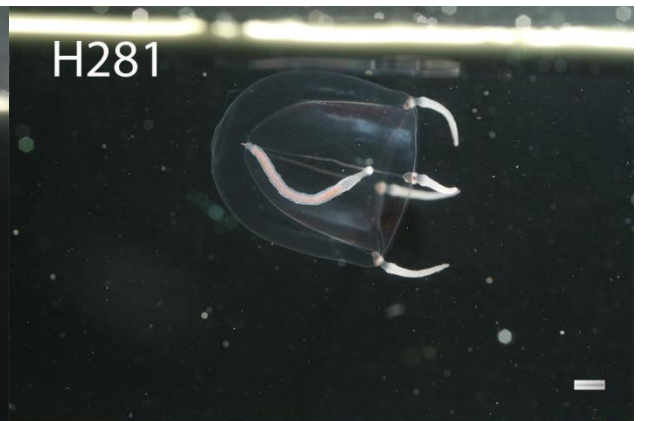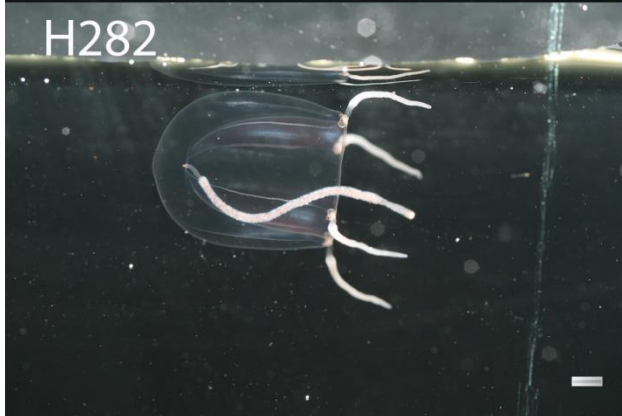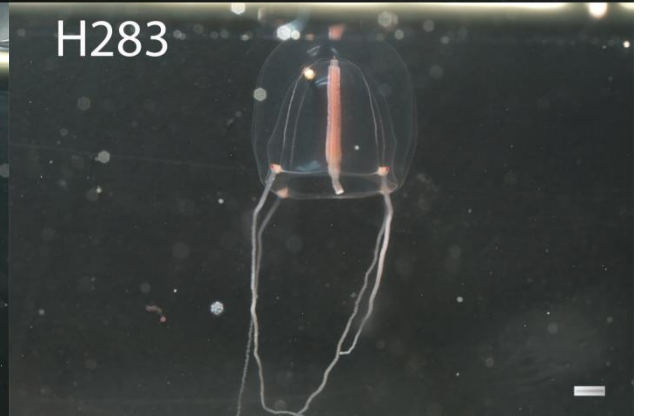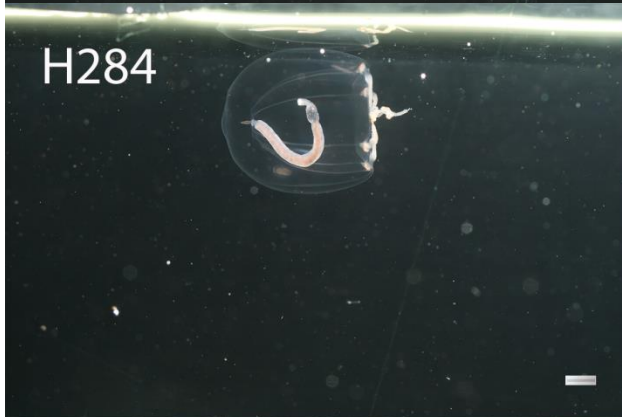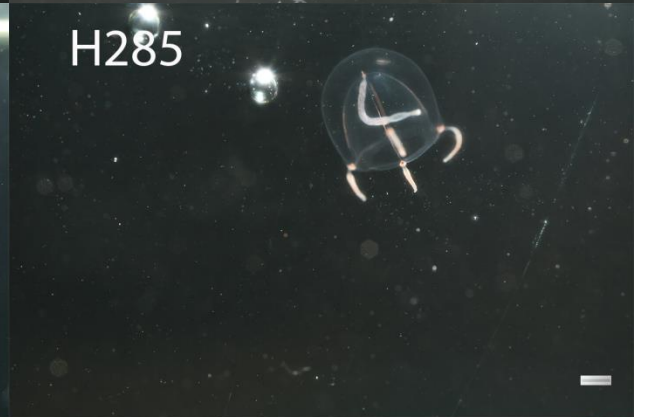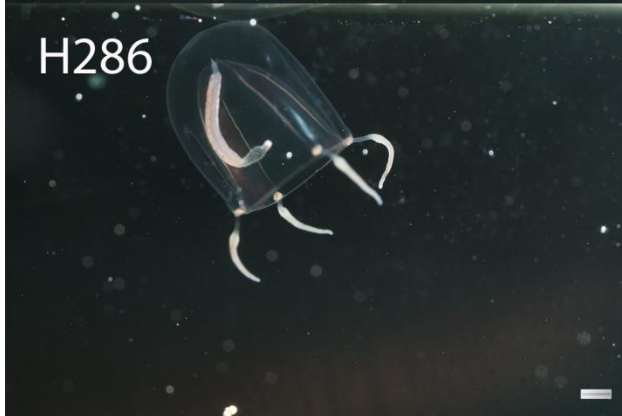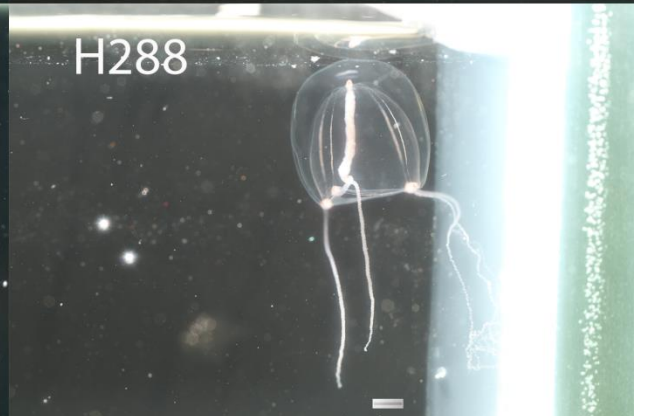

H289

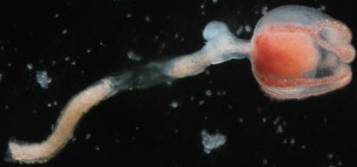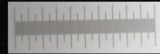

H332

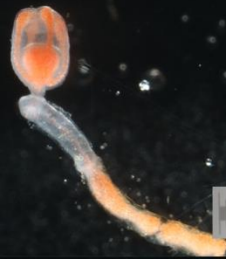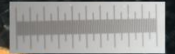

H333

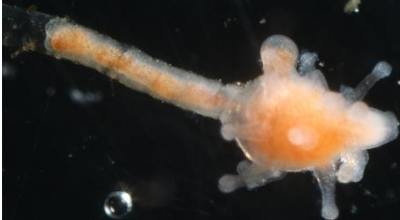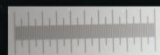

H334

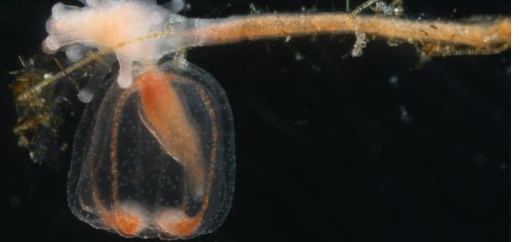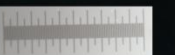

H335

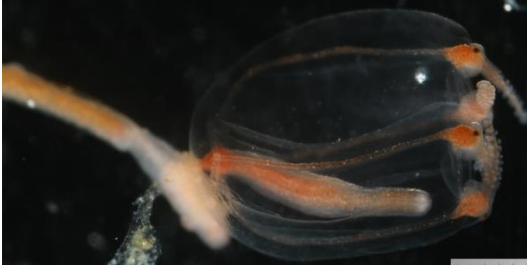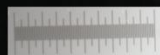

H336

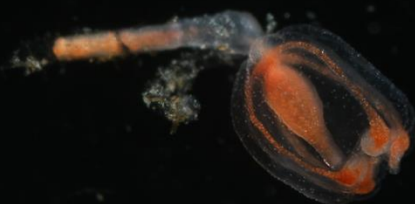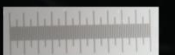

H337

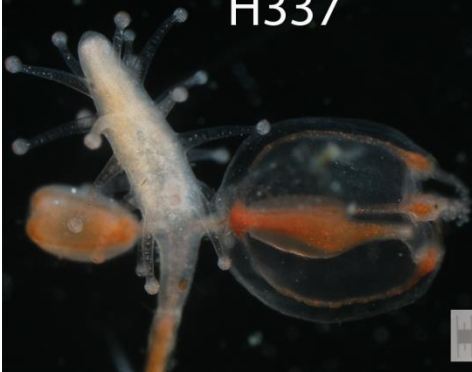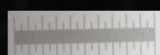

H338

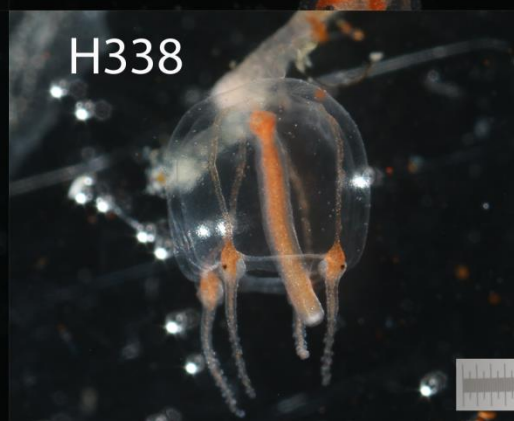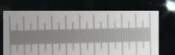



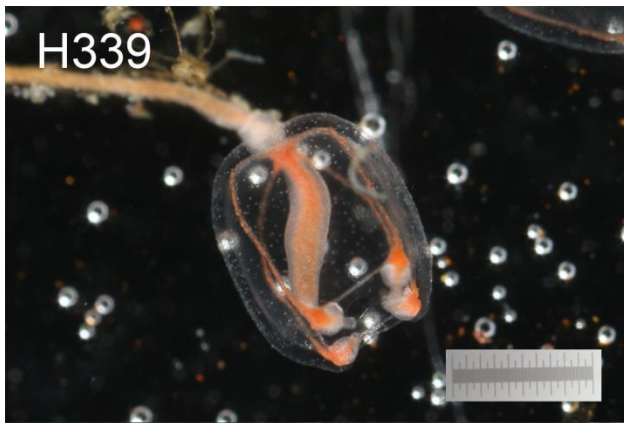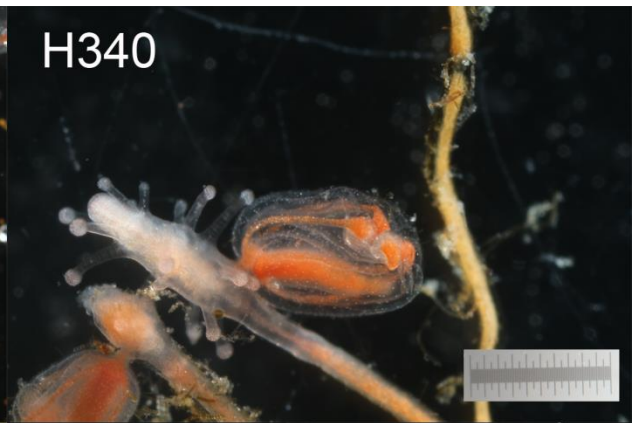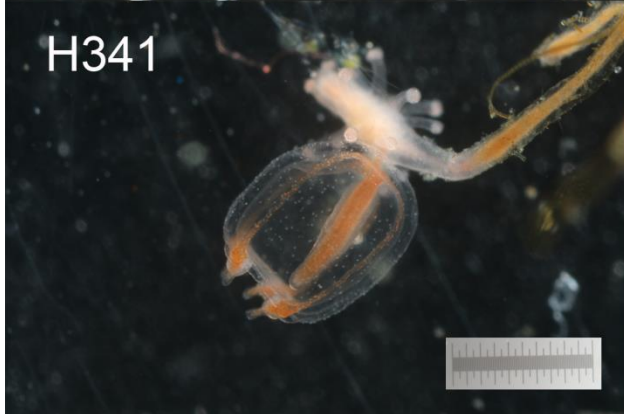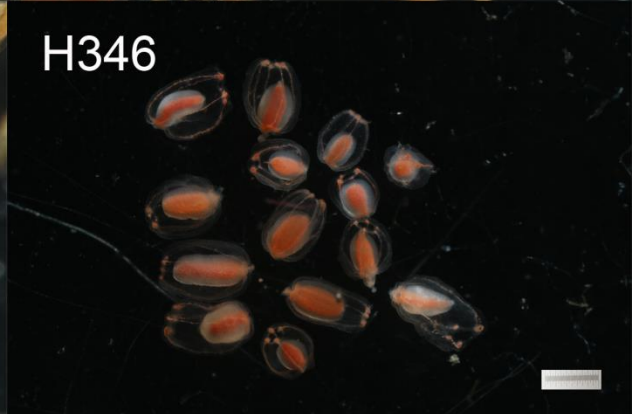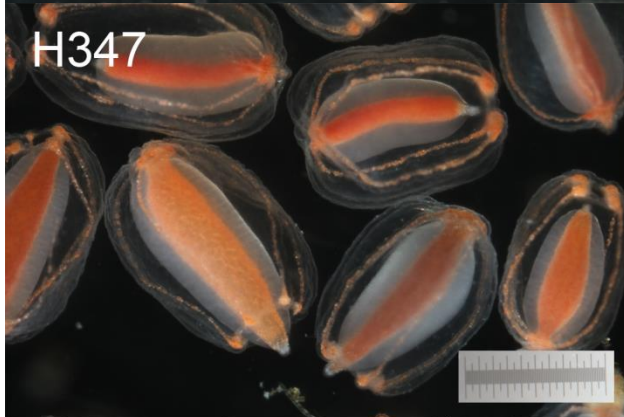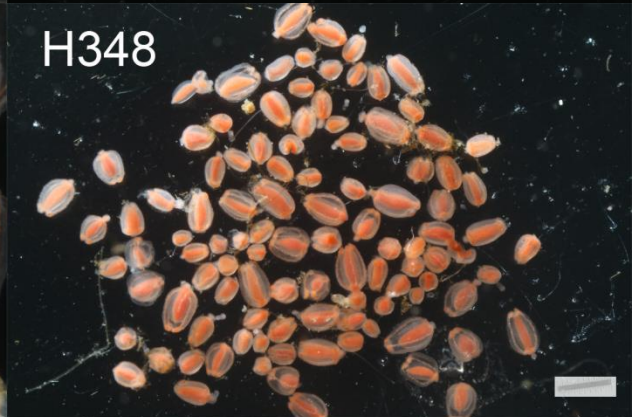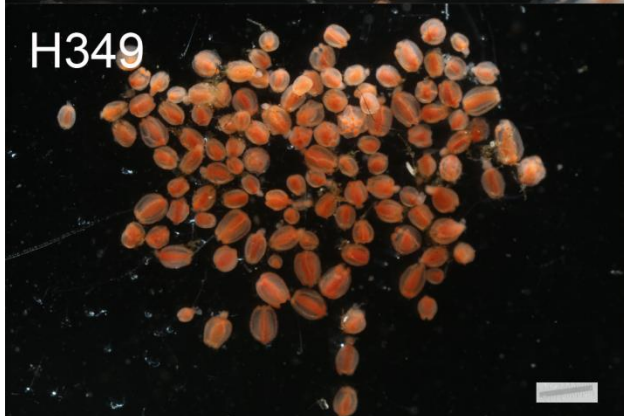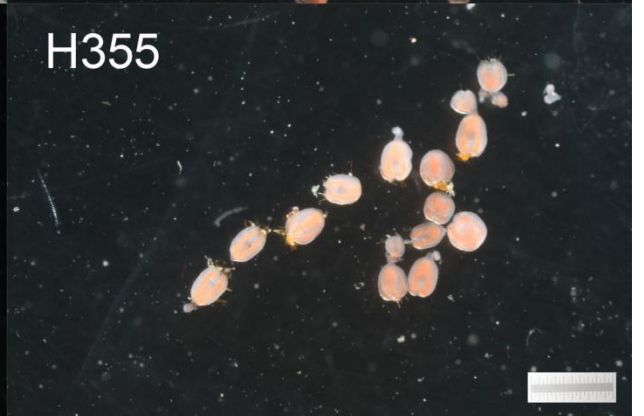

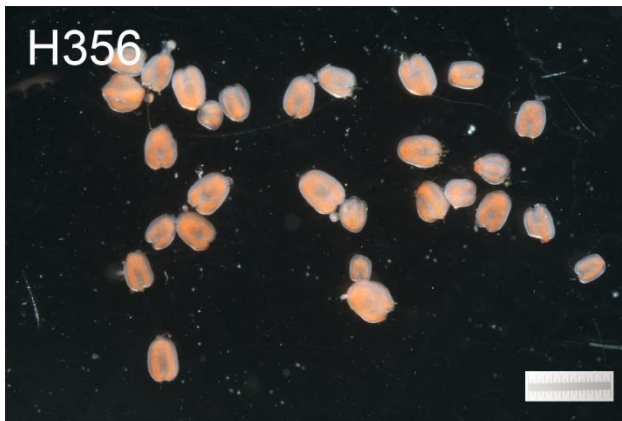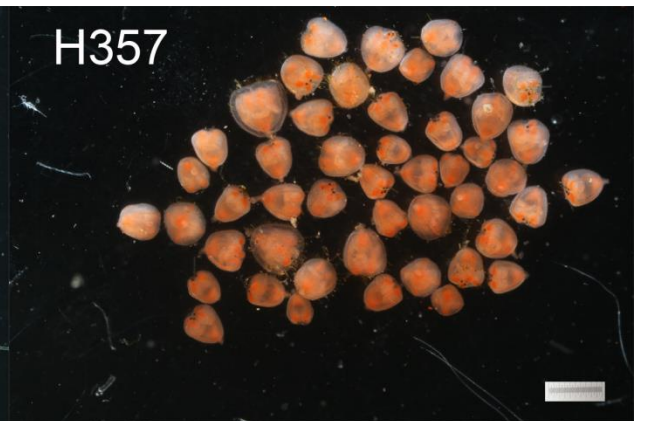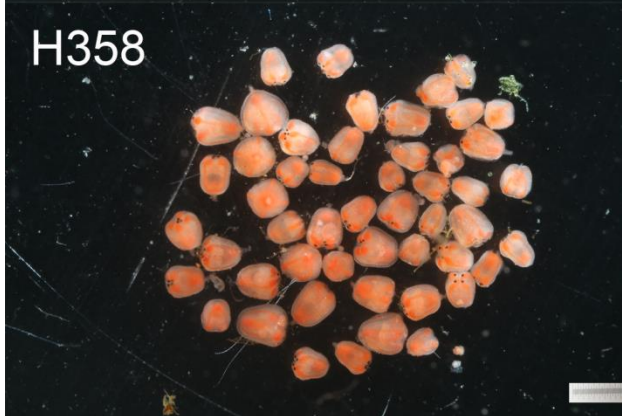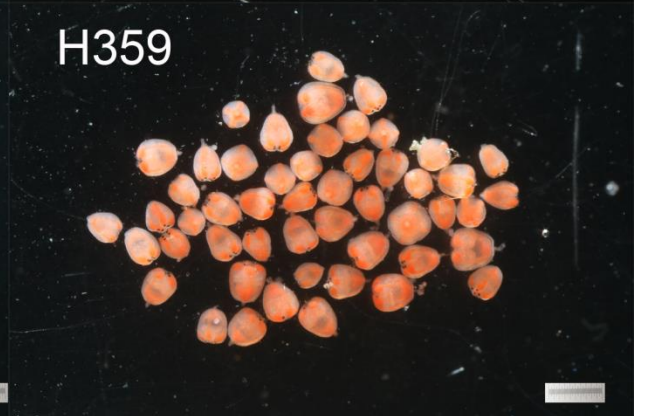

Supplement: s1 [file s1]
